# Supplementary material
Source: PubMed Central journal article supplement (PMC5706112)
Supplement: NIHMS921572-supplement-Supplement1.pdf [file NIHMS921572-supplement-Supplement1.pdf]

## Supplementary Appendix

This appendix has been provided by the authors to give readers additional information about their work.

Supplement to: Berlowitz DR, Foy CG, Kazis LE, et al. Effect of intensive blood-pressure treatment on patient-reported outcomes. *N Engl J Med* 2017;377:733-44. DOI: 10.1056/NEJMoa1611179

## Table of Contents

|                                                                                      | <u>Page</u> |
|--------------------------------------------------------------------------------------|-------------|
| <b>List of Investigators and Acknowledgements:</b>                                   | <b>3</b>    |
| <b>Supplementary Methods</b>                                                         | <b>12</b>   |
| <b>Figures</b>                                                                       |             |
| <b>S1:</b> VR-12 scores by treatment group and Mental Comorbidity Category           | <b>15</b>   |
| <b>S2:</b> VR-12 scores by treatment group and baseline PCS                          | <b>16</b>   |
| <b>S3:</b> VR-12 scores by treatment group and cognitive status                      | <b>17</b>   |
| <b>S4:</b> VR-12 scores by treatment group and frailty status                        | <b>18</b>   |
| <b>S5:</b> VR-12 for participants with complete data vs those with missing data      | <b>19</b>   |
| <b>Tables</b>                                                                        |             |
| <b>S1:</b> Completion of VR-12 by study visit                                        | <b>20</b>   |
| <b>S2:</b> Additional baseline characteristics of study participants                 | <b>21</b>   |
| <b>S3-S5:</b> Mean annual change in score on PCS, MCS, and PHQ-9                     | <b>23</b>   |
| <b>S6-S8:</b> Sensitivity analysis with follow-up through 12/1/15 instead of 8/20/15 | <b>29</b>   |
| <b>S9-S11:</b> Sensitivity analysis censoring participants after non-fatal CV events | <b>35</b>   |
| <b>S12:</b> Sensitivity analyses for VR-12 scores based on multiple imputation       | <b>41</b>   |
| <b>References</b>                                                                    | <b>42</b>   |

## **SPRINT PUBLICATIONS LIST OF INVESTIGATORS AND ACKNOWLEDGEMENTS**

**Study Leadership:** Paul Whelton (Chair), Karen C. Johnson (Vice-Chair), Lawrence Fine (Project Officer), Joni Snyder (Deputy Project Officer).

**Program Office: National Institutes of Health, Bethesda, Maryland:** Diane Bild (Project Scientist), Denise Bonds (Project Scientist), Nakela Cook (Project Scientist), Jeffrey Cutler (Project Scientist), Lawrence Fine (Project Officer), Peter Kaufmann (Project Scientist), Paul Kimmel (Project Scientist), Lenore Launer (Project Scientist), Claudia Moy (Project Scientist), William Riley (Project Scientist), Laurie Ryan (Project Scientist), Joni Snyder (Deputy Project Officer), Eser Tolunay (Project Scientist), Song Yang (Biostatistician)

**SPRINT Clinical Center Networks: Case Western Reserve University, Cleveland, OH:** Jackson T Wright Jr (CCN PI), Mahboob Rahman (CCN Co-PI), Alan J Lerner (CCN MIND PI), Mahboob Rahman (CCN Co-PI), Carolyn Still (CCN Project Manager, Co-I), Alan Wiggers (Co-I), Sara Zamanian, (CCN Asst. Project Manager), Alberta Bee (former CCN Asst. Project Manager), Renee Dancie (former CCN Project Manager); **Memphis Veteran Affairs Medical Center, Memphis, TN:** William Cushman (PI), Barry Wall (Co-I), Linda Nichols (MIND PI), Robert Burns (MIND Consultant), Jennifer Martindale-Adams (MIND Consultant), Dan Berlowitz (Economic & HRQL Consultant), Elizabeth Clark (CCN Coordinator), Sandy Walsh (CCN Coordinator) Terry Geraci (CCN Coordinator) Carol Huff (Budget Analyst), Linda Shaw (CCN Research Assistant). **University of Alabama, Birmingham, AL:** Suzanne Oparil (PI), Cora E. Lewis (Co-PI), Virginia Bradley (MIND Co-I), David Calhoun (Co-I), Stephen Glasser (Co-I), Kim Jenkins (CCN Coordinator), Tom Ramsey (CCN Coordinator); **University of Utah, Salt Lake City, UT:** Alfred K. Cheung (PI), Srinivasan Beddhu (Co-I), Gordon Chelune (MIND Co-I), Jeffrey Childs (Associate Director of Operations), Lisa Gren (Director of Operations), Anne Randall (CCN Coordinator); **Wake Forest University Health Sciences, Winston-Salem, NC:** Michael Rocco (PI), David Goff (Co-PI), Carlos Rodriguez (Co-I), Laura Coker (Co-I), Amret Hawfield (Co-I), Joseph Yeboah (Co-I), Lenore Crago (CCN Coordinator) John Summerson (CCN Coordinator), Anita Hege (MIND Coordinator).

**SPRINT Central Coordinating Center: Wake Forest University Health Sciences, Winston-Salem, NC:** David Reboussin (PI), Jeff Williamson (Co-PI), Walter Ambrosius (Co-I), William Applegate (Co-I), Greg Evans (Co-I), Capri Foy (Co-I), Barry I. Freedman (Co-I), Dalane Kitzman (Co-I), Mary Lyles (Co-I), Nick Pajewski (Co-I) , Steve Rapp (Co-I), Scott Rushing (Co-I), Neel Shah (Co-I), Kaycee M. Sink (Co-I, Safety Officer), Mara Vitolins (Co-I), Lynne Wagenknecht (Co-I), Valerie Wilson (Co-I), Letitia Perdue (Project Coordinator), Nancy Woolard (MIND Project Coordinator), Tim Craven (Biostatistician), Katelyn Garcia (Biostatistician), Sarah Gaussoin (Biostatistician), Laura Lovato (Biostatistician), Jill Newman (Biostatistician), Bobby Amoroso (Programmer), Patty Davis (Programmer), Jason Griffin (Programmer), Darrin Harris (Programmer), Mark King (Programmer), Kathy Lane (Programmer), Wes Roberson (Programmer), Debbie Steinberg (Programmer), Donna Ashford (Project Manager), Phyllis Babcock (Project Manager), Dana Chamberlain (Project Manager), Vickie Christensen (Project Manager), Loretta Cloud (Project Manager), Christy Collins (Project Manager), Delilah Cook (Project Manager), Katherine Currie (Project Manager), Debbie Felton (Project Manager), Stacy Harpe (Project Manager), Marjorie Howard (Project Manager), Michelle Lewis (Project Manager), Pamela Nance (Project Manager), Nicole Puccinelli-Ortega (Project Manager), Laurie Russell (Project Manager), Jennifer Walker (Project Manager), Brenda Craven (former Project Coordinator), Candace Goode (Data Coordinator), Margie Troxler (Fiscal Coordinator), Janet Davis (Administrative Support), Sarah Hutchens (Administrative Support). **WFU CC Publication**

**Acknowledgement:** Wake Forest University Claude D. Pepper Older Americans Independence Center (P30-AG21332).

**SPRINT Central Laboratory: University of Minnesota Advanced Research and Diagnostic Laboratory:** Anthony A. Killeen (PI), Anna M. Lukkari (coordinator). **Acknowledgement statement:** This project was supported by Award Number **N01-HC-95240**. The content is solely the responsibility of the author and does not reflect the official views of the NHLBI.

**SPRINT Drug Distribution Center: VA Cooperative Studies Program Clinical Research Pharmacy Coordinating Center:** Robert Ringer (PI), Brandi Dillard (coordinator), Norbert Archibeque, (coordinator) Stuart Warren (Co-I), Mike Sather (PI), James Pontzer (programmer), Zach Taylor (programmer).

**SPRINT ECG Reading Center: Epidemiological Cardiology Research Center (EPICARE), Winston Salem, NC:** Elsayed Z Soliman (PI), Zhu-Ming Zhang (Co-I), Yabing Li (coordinator), Chuck Campbell (coordinator), Susan Hensley (coordinator), Julie Hu (coordinator), Lisa Keasler (coordinator), Mary Barr (coordinator), Tonya Taylor (coordinator)

**SPRINT MRI Reading Center: University of Pennsylvania-Philadelphia, PA:** R. Nick Bryan (PI), Christos Davatzikos (Co-I), Ilya Nasarallah (Co-I), Lisa Desiderio (Project Manager), Mark Elliott (MRI Physicist), Ari Borthakur (MRI Physicist), Harsha Battapady (Data Analyst), Guray Erus ( Postdoctoral Fellow), Alex Smith (Postdoctoral Fellow), Ze Wang (Research Associate), Jimit Doshi (Data Analyst). **SPRINT MRI by site: University of Pennsylvania-Philadelphia, PA:** Raymond Townsend (Clinic PI), Debbie Cohen (Co-I), Yonghong Huan (Co-I), Mark Duckworth (Research Coordinator), Virginia Ford (Research Coordinator), Kelly Sexton (MRI Coordinator). **University Hospital Case Medical Center-Cleveland, OH:** Jackson T. Wright, Jr. (PI), Alan Lerner (Co-I), Mahboob Rahman (Co-I), Carolyn Still (Project Manager), Alberta Bee (Research Coordinator), Debra Lee Stokes, (MRI coordinator), Shonte Smith (MRI coordinator), Jeffrey Sunshine (Site Radiologist), Mark Clampitt (MRI Technologist). **Vanderbilt University:** Seth Smith (MRI Director), Brian Welch (MRI Research Manager), Manus Donahue ( MRI Physicist), Alex Dagley (Researcher Coordinator), Dave Pennell (MRI Technologist), Chris Cannistraci (Imaging Research Specialist), Kristin Merkle (MRI Research Coordinator), Julie Lewis (Clinic PI) Mohammed Sika (Research Coordinator). **University of Miami:** Clinton Wright (Co-I), Mohammad Sabati (MRI Director), Edward Campuzano (Chief MRI Technologist), Hector Martin (MRI Technologist), Andrea Roman (MRI Technologist), Jesus Cruz (MRI Technologist), Natalya Nagornaya (Site Radiologist). **Wake Forest University:** Laura Coker (Co-I), Anita Hege (Project Coordinator), Joseph Maldjian (Site Radiologist), Sandra Kaminsky (MRI Technologist), Debra Fuller (MRI Technologist), Youngkoo Jung (MRI Physicist). **University of Alabama at Birmingham:** Suzanne Oparil (Network PI), Beth Lewis (Co-PI), Virginia Wadley (MIND Co-I), Kim Jenkins (Project Coordinator), Tom Ramsey (Project Coordinator), William Evanochko (MRI Physicist), Glenn Roberson (Site Radiologist), Trina Corbitt (MRI Technologist), William Fisher (MRI Technologist), Cathy Clements (MRI Technologist). **Boston University:** Daniel Weiner (Clinic PI), Andrew Wells (Research Coordinator), Amanda Civileto (Research Coordinator), Gerard P. Aurigemma (Clinic PI), Noelle Bodkin (Research Coordinator), Alex Norbash (Co-I,) Margaret Lavoye (Research Administrator), Andrew Ellison (MRI Technologist), Ronald Killiany (Imaging Center Director), Osama Sakai (Site Radiologist).

**SPRINT Sub-Committee Chairs: Ancillary Science:** Alfred Cheung, **Design and Analysis:** Walter Ambrosius, **Economic Evaluation/Health Related Quality of Life:** Dan Berlowitz, **Intervention:** William Cushman, **Measurements, Procedures and Quality Control:** Beth Lewis, **Mortality and Morbidity:** Suzanne Oparil, **Presentations and Publications:** Jackson T. Wright, Jr., **Recruitment, Retention and Adherence:** David Goff, **Safety:** Kaycee Sink, **SPRINT MIND:** Jeff Williamson.

**SPRINT Clinical Centers by Network: OHIO Network: Cleveland Clinic Foundation-Cleveland, OH:** George Thomas (PI), (Co-PI), Martin Schreiber, Jr (Co-I), Sankar Dass Navaneethan (Co-I), John Hickner (Co-I), Michael Lioudis (Co-I), Michelle Lard (Co-I), Susan Marczewski (former coordinator), Jennifer Maraschky (coordinator), Martha Colman (former coordinator) Andrea Aaby (coordinator), Stacey Payne (coordinator), Melanie Ramos, (coordinator), Carol Horner (former coordinator). **Louis Stokes Cleveland VA Medical Center-Cleveland, OH:** Mahboob Rahman (PI), Paul Drawz (Co-I), , Pratibha P. Raghavendra (Co-I), Scott Ober (Co-I), Ronda Mourad (Co-I), Muralidhar Pallaki (Co-I), Peter Russo (Co-I), Pratibha Raghavendra, Co-I), Pual Fantauzzo (Co-I), Lisa Tucker (coordinator), Bill Schwing (coordinator). **MetroHealth Medical Center-Cleveland, OH:** John R. Sedor (PI), Edward J. Horwitz (Co-PI), Jeffrey R. Schelling (Co-I), John F. O'Toole (Co-I), Lisa Humbert (coordinator), Wendy Tutolo (coordinator). **North East Ohio Neighborhood Health Center-Cleveland, OH:** Suzanne White (PI), Alishea Gay (Former Co-I), Walter Clark, Jr (former PI), Robin Hughes (coordinator). **University Hospital Case Medical Center-Cleveland, OH:** Mirela Dobre (PI), Jackson T. Wright, Jr. (Co-I), Carolyn H. Still (Co-I), Alberta Bee (coordinator), Monique Williams (coordinator). **The Ohio State University Medical Center, Division of Nephrology and Hypertension-Columbus, OH:** Udayan Bhatt (PI), Lee Hebert (former PI) Anil Agarwal (Co-PI), Melissa Brown Murphy (coordinator), Nicole Ford (former coordinator), Cynthia Stratton (coordinator), Jody Baxter (former coordinator), Alicia A. Lykins (former coordinator), Alison McKinley Neal (former coordinator) Leena Hirmath (former coordinator). **The Ohio State University Medical Center, Division of Endocrine, Diabetes, and Metabolism-Columbus, OH:** Osei Kwame (PI), Kyaw Soe (Co-I), William F. Miser (former Co-PI), Colleen Sagrilla (coordinator), Jan Johnston (coordinator), Amber Anaya (coordinator), Ashley Mintos (coordinator), Angel A. Howell (coordinator), Kelly Rogers (former coordinator), Sara Taylor (former Co-I). **University Hospitals Landerbrook Health Center-Mayfield Height, OH:** Donald Ebersbacher (PI), Lucy Long (coordinator), Beth Bednarchik (coordinator). **University Hospitals Glenridge Office Park-North Royalton, OH:** Alan Wiggers (PI), Lucy Long (coordinator). **University Hospitals Suburban Health-Cleveland, OH:** Adrian Schnall (PI), Jonathan Smith (coordinator), Lori Peysha (coordinator), Lori Peysha (coordinator), Beth Bednarchik (coordinator), Lisa Leach (coordinator), Megan Tribout (coordinator). **University Hospitals Otis Moss Jr. Health Center-Cleveland, OH:** Carla Harwell (PI), Pinkie Ellington (coordinator). **SUNY Downstate Medical Center, New York:** Mary Ann Banerji (PI), Pranav Ghody (Co-I), Melissa Vahideh Rambaud (coordinator). **University of Pennsylvania-Philadelphia, PA:** Raymond Townsend (PI), Debbie Cohen (Co-I), Yonghong Huan (Co-I), Mark Duckworth (former coordinator), Virginia Ford (coordinator), Juliet Leshner (coordinator), Ann Davison (coordinator), Sarah Vander Veen (coordinator). **Temple University-Philadelphia, PA:** Crystal A Gadegbeku (PI), Avi Gillespie (Co-I), Anuradha Paranjape (Co-I), Sandra Amoroso (coordinator), Zoe Pfeffer (coordinator), Sally B. Quinn (coordinator). **Tulane University-New Orleans, LA:** Jiang He (PI), Jing Chen (Co-I), Eva Lustigova (coordinator), Erin Malone (coordinator). **Ochsner Clinic Foundation-New Orleans, LA:** Marie Krousel-Wood (PI), Richard Deichmann (Co-I), Patricia Ronney (Co-I), Susan Muery (coordinator), Donnalee Trapani (coordinator). **CWRU CCN Publication Acknowledgements: CWRU:** This publication was made possible by the Clinical and Translational Science Collaborative of Cleveland,

**UL1TR000439** from the National Center for Advancing Translational Sciences (NCATS) component of the National Institutes of Health and NIH roadmap for Medical Research. Its contents are solely the responsibility of the authors and do not necessarily represent the official views of the NIH. **OSU:** The project described was supported by Award Number **UL1RR025755** from the National Center for Research Resources. The content is solely the responsibility of the authors and does not necessarily represent the official views of the National Center for Research Resources or the National Institutes of Health. **U Penn:** The project described was supported by the National Center for Research Resources, Grant UL1RR024134, and is now at the National Center for Advancing Translational Sciences, **Grant UL1TR000003**. The content is solely the responsibility of the authors and does not necessarily represent the official views of the NIH. **SOUTHEAST Network: Georgia Regents University, Augusta, GA:** Matt Diamond (PI), Laura Mulloy (PI), Marcella Hodges (coordinator), Michelle Collins (coordinator), Charlene Weathers (coordinator), Heather Anderson (former coordinator), Emily Stone (former coordinator), Walida Walker (former coordinator). **Carolinas Medical Center, Charlotte, NC:** Andrew McWilliams (PI), Michael Dulin (Co-I), Lindsay Kuhn (Co-PI), Susan Standridge (coordinator), Lindsay Lowe (coordinator), Kelly Everett (coordinator), Kelry Preston (former coordinator), Susan Norton (former coordinator), Silena Gaines (former coordinator). **University of South Carolina, Columbia, SC:** Ali A. Rizvi (PI), Andrew W. Sides (Co-PI), Diamond Herbert (coordinator), Matthew M. Hix (coordinator), Melanie Whitmire (former coordinator (former coordinator), Brittany Arnold (former coordinator), Philip Hutchinson (former coordinator), Joseph Espiritu (former coordinator). **Duke University, Durham, NC:** Mark Feinglos (PI), Eugene Kovalik (Co-PI), Georgianne Gedon-Lipscomb (coordinator), Kathryn Evans (coordinator), Connie Thacker (coordinator), Ronna Zimmer (coordinator), Mary Furst (coordinator), MaryAnn Mason (former coordinator). **East Carolina University, Greenville, NC:** James Powell (PI), Paul Bolin (Co-PI), Junhong Zhang (Co-PI), Mary Pinion (coordinator), Gail Davis (coordinator), Winifred Bryant (former coordinator), Presley Phelps (former coordinator), Connie Garris-Sutton (former coordinator), Beatrice Atkinson (former coordinator). **University of Miami, Miami, FL:** Gabriele Contreras (PI), Maritza Suarez (Co-PI), Ivonne Schulman (Co-PI), Don Koggan (coordinator), Jackie Vassallo (coordinator), Gloria Peruyera (former coordinator). **Wake Forest Nephrology, Winston Salem, NC:** Michael Rocco (PI), Amret Hawfield (Co-PI), Cassandra Bethea (coordinator), Sheri Mayer (coordinator), Laura Gilliam (former coordinator). **Wake Forest Downtown Health Plaza, Winston Salem, NC:** Carolyn Pedley SPRINT Publications Acknowledgment List May, 2016 (PI), Geraldine Zurek (coordinator), Miriam Baird (coordinator), Charles Herring (Pharm D), Mary Martha Smoak (former coordinator). **Wake Forest Geriatrics, Winston Salem, NC:** Julie Williams (PI), Samantha Rogers (Co-PI), Lindsay Gordon (coordinator), Erin Kennedy (coordinator), Beverly Belle (coordinator), Jessica McCorkle-Doomy (former coordinator), Jonathan Adams (former coordinator), Dana Chamberlain (former coordinator). **University of South Florida, Tampa, FL:** Ramon Lopez (PI), Juris Janavs (coordinator). **Emory University, Atlanta, GA:** Frederic Rahbari-Oskoui (PI), Arlene Chapman (former PI), Allen Dollar (former Co-PI), Olubunmi Williams (coordinator), Yoosun Han (former coordinator). **The Mayo Clinic Jacksonville, Jacksonville, FL:** William Haley (PI), Peter Fitzpatrick (Co-PI), Joseph Blackshear (Co-PI), Brian Shapiro (Co-PI), Anna Harrell (coordinator), Arta Palaj (coordinator), Katelyn Henderson (coordinator), Ashley Johnson (former coordinator), Heath Gonzalez (former coordinator), Jermaine Robinson (former coordinator). **Miami VA, Miami, FL:** Leonardo Tamariz (PI), Ivonne Schulman (Co-PI), Jennifer Denizard (coordinator), Rody Barakat (former coordinator), Dhurga Krishnamoorthy (former coordinator). **Pennington Biomedical Research, Baton Rouge, LA:** Frank Greenway (PI), Ron Monce (Co-I), Timothy Church (former PI), Chelsea Hendrick (coordinator), Aimee Yoches (coordinator), Leighanne Sones (coordinator), Markee Baltazar (former coordinator). **Morehouse School of Medicine, Atlanta, GA:** Priscilla Pemu (PI), Connie Jones (coordinator), Derrick Akpalu (coordinator). **UTAH Network: Boston University**

**Medical Center, Boston MA:** Laura Dember (PI), Denise Soares (coordinator). **Henry Ford Hospital, Detroit MI:** Jerry Yee (PI), Kausik Umanath (Co-PI), Naima Ogletree (Sub-I), Schawana Thaxton (Sub-I), Karen Campana (coordinator), Dayna Sheldon (coordinator), Krista MacArthur (coordinator). **Intermountain Health Care, Salt Lake City UT:** J. Brent Muhlestein (PI), Nathan Allred (Co-I), Brian Clements (Co-I), Ritesh Dhar (Co-I), Kent Meredith (Co-I), Viet Le (Co-I), Edward Miner (Co-I), James Orford (Co-I), Erik R. Riessen (Co-I), Becca Ballantyne (coordinator), Ben Chisum (coordinator), Kevin Johnson (coordinator), Dixie Peeler (coordinator). **Stanford University, Palo Alto CA:** Glenn Chertow (PI), Manju Tamura (Co-PI), Tara Chang (Co-I), Kevin Erickson (Co-I), Jenny Shen (Co-I), Randall S. Stafford (Co-I), Gregory Zaharchuk (Co-I), Margareth Del Cid (coordinator), Michelle Dentinger (coordinator), Jennifer Sabino (coordinator), Rukmani Sahay (coordinator), Ekaterina (Katie) Telminova (coordinator). **Tufts Medical Center, Boston MA:** Daniel E. Weiner (PI), Mark Sarnak (Co-I), Lily Chan (coordinator), Amanda Civileto (coordinator), Alyson Heath (coordinator), Amy Kantor (coordinator), Priyanka Jain (coordinator), Bethany Kirkpatrick (coordinator), Andrew Well (coordinator), Barry Yuen (coordinator). **University of Colorado, Denver, Denver CO:** Michel Chonchol (PI), Beverly Farmer (coordinator), Heather Farmer (coordinator), Carol Greenwald (coordinator), Mikaela Malaczewski (coordinator). **University of Illinois, Chicago, Chicago IL:** James Lash (PI), Anna Porter (Co-I), Ana Ricardo (Co-I), Robert T. Rosman (Co-I), Janet Cohan (coordinator), Nieves Lopez Barrera (coordinator), Daniel Meslar (coordinator), Patricia Meslar (coordinator). **University of Pittsburgh, Pittsburgh PA:** Margaret (Molly) Conroy (PI), Mark Unruh (PI), Rachel Hess (Co-PI), Manisha Jhamb (Co-I), Holly Thomas (Co-I), Pam Fazio (coordinator), Elle Klixbull (coordinator), Melissa Komlos-Weimer (coordinator), LeeAnne Mandich (coordinator), Tina Vita (coordinator). **University of Texas Southwestern, Dallas TX:** Robert Toto (PI), Peter Van Buren (Co-I), Julia Inrig (Co-I), Martha Cruz (coordinator), Tammy Lightfoot (coordinator), Nancy Wang (coordinator), Lori Webster (coordinator). **University of Utah, Salt Lake City UT:** Srinivasan Beddhu (PI), Kalani Raphael (Co-I), Barry Stults (Co-I), Tahir Zaman (Co-I), Debra Simmons (Co-I), Tooran Lavasani (nurse practitioner), Rebecca Filipowicz (Sr. research analyst), Guo Wei (Sr research analyst), Gracie Mary Miller (coordinator), Jenice Harerra (coordinator), Jeff Christensen (Clinical research assistant), Ajay Giri (Clinical research assistant), Xiaorui Chen (graduate research assistant), Natalie Anderton (graduate research assistant), Arianna Jensen (undergraduate research assistant). **Vanderbilt University, Nashville TN:** Julia Lewis (PI), Anna Burgner (Co-I), Jamie P. Dwyer (Co-I), Gerald Schulman (Co-I), Terri Herrud (coordinator), Ewanda Leavell (coordinator), Tiffany McCray (coordinator), Edwina McNeil-Simaan (coordinator), Munmun Poudel (coordinator), Malia Reed (coordinator), Mohammed Sika (coordinator), Delia Woods (coordinator), Janice L. Zirkenbach (coordinator). **George Washington University, Washington DC:** Dominic S. Raj (PI), Scott Cohen (Co-I), Samir Patel (Co-I), Manuel Velasquez (Co-I), Roshni S. Bastian (coordinator), Maria Wing (coordinator) Akshay Roy-Chaudhury (Coordinator). **University of California, Davis, Sacramento CA:** Thomas Depner (PI), Lorien Dalrymple (Co-I), George Kaysen (Co-I), Susan Anderson (coordinator). **Salt Lake City VA, Salt Lake City UT:** Srinivasan Beddhu (PI), John Nord (Co-I), Debra Simmons (Co-I), Gracie Mary Miller (coordinator), Jenice Harerra (coordinator), Ajay Giri (Clinical research assistant). **Veterans Medical Research Foundation, San Diego CA:** Joachim H. Ix (PI), Leonard Goldenstein (Co-PI), Cynthia M. Miracle (Co-I), Nketi Forbang (coordinator), Maja Mircic (coordinator), Brenda Thomas (coordinator), Tiffany Tran (coordinator). **UCLA, Los Angeles CA:** Anjay Rastogi (PI), Mihae Kim (Sub-PI), Mohamad Rashid (Co-PI), Bianca Lizarraga (coordinator), Amy Hocza (coordinator), Kristine Sarmosyan (coordinator), Jason Norris (coordinator), Tushar Sharma (coordinator), Amanda Chioy (coordinator), Eric Bernard (coordinator), Eleanore Cabrera (coordinator), Christina Lopez (coordinator), Susana Nunez (coordinator), Joseph Riad (coordinator), Suzanne Schweitzer (coordinator), Siran Sirop (coordinator), Sarah Thomas (coordinator), Lauren Wada (coordinator). **Loyola University Medical Center, Chicago IL:** Holly Kramer (PI), Vinod Bansal

(Co-PI), Corliss E. Taylor (coordinator). **University of Florida, Gainesville FL:** Mark S. Segal (PI), Karen L. Hall (Co-I), Amir Kazory (Co-I), Lesa Gilbert (coordinator), Linda Owens (coordinator), Danielle Poulton (coordinator), Elaine Whidden (coordinator). **University of Michigan, Ann Arbor MI:** Jocelyn (Jo) Wiggins (PI), Caroline Blaum (PI), Linda Nyquist (Co-I), Lillian Min (Co-I), Tanya Gure (Co-I), Ruth Lewis (coordinator), Jennifer Mawby (coordinator), Eileen Robinson (coordinator). **UTAH CCN Publication Acknowledgments: Boston:** The trial was supported by a CTSA grant **UL1 RR025771**. **Stanford:** Spectrum is part of the Clinical and Translational Science Award (CTSA) program, funded by the National Center for Advancing Translational Sciences (Grant: **UL1 TR000093**) at the National Institutes of Health (NIH). All publications resulting from the use of Spectrum resources must cite this grant number. **Tufts:** The project described was supported by the National Center for Research Resources Grant Number **UL1RR025752** and the National Center for Advancing Translational Sciences, national Institutes of Health, Grant Numbers **UL1 TR000073** and **UL1 TR001064**. The content is solely the responsibility of the authors and does not necessarily represent the official views of the NIH. **University of Illinois:** The project described was supported by Grant number **UL1TR000050**, Clinical Interface Core. **UT Southwestern:** The current CTSA grant number is **9U54TR000017-06**. University of Texas Southwestern Clinical and Translational Alliance for Research. **University of Utah:** CTSA Grant number is **UL1TR000105-05**. Center for Clinical and Translational Science. **Vanderbilt University:** Research reported in this publication was supported by the National Center for Advancing Translational Sciences of the National Institute of Health under Award Number **UL1 TR000445**. The content is solely the responsibility of the authors and does not necessarily represent the official views of the National SPRINT Publications Acknowledgment List May, 2016 Institutes of Health. Vanderbilt Institute for Clinical and Translational Research (VICTR). **University of CA, Davis:** CTSA Grant number **UL1 TR000002**. National Center for Advancing Translational Sciences. **University of Florida:** This work is supported in part by the NIH/NCATS Clinical and Translational Science Award to the University of Florida, Award Number **UL1 TR000064**; UF Clinical Research Center (UF CRC). **University of Michigan:** This work is supported in part by the Michigan Institute for Clinical and Health Research, Award Number **UL1TR000433**. **UAB Network: Athens Internal Medicine, Athens, AL:** Nauman Qureshi (PI), Karen Ferguson (coordinator), Sumrah Haider (coordinator), Mandy James (coordinator), Christy Jones (coordinator), Kim Renfroe (coordinator), April Seay (coordinator), Carrie Weigart (coordinator). **UAB - The Chronic Kidney Disease Clinic, Birmingham, AL:** Denyse Thornley-Brown (PI), Dana Rizik (Co-I), Bari Cotton (coordinator), Meredith Fitz-Gerald (coordinator), Tiffany Grimes (coordinator), Carolyn Johnson (coordinator), Sara Kennedy (coordinator), Chanel Mason (coordinator), Lesa Rosato-Burson (coordinator), Robin Willingham (coordinator). **UAB - Vascular Biology and Hypertension Clinic, Birmingham, AL:** David Calhoun (PI), Eric Judd (Co-I), Tonya Breaux-Shropshire (coordinator), Felice Cook (coordinator), Julia Medina (coordinator). **Nephrology Associates, P.C., Birmingham, AL:** James Lewis (PI), Roman Brantley (Co-I), John Brouillette (Co-I), Jeffrey Glaze (Co-I), Stephanie Hall (Co-I), Nancy Hiott (Co-I), David Tharpe (Co-I), Spencer Boddy (coordinator), Catherine Mack (coordinator). **University of Tennessee Health Science Center, Memphis, TN:** Karen C. Johnson (PI) Catherine Womack (Co -I), Beate Griffin (coordinator), Carol Hendrix (coordinator), Karen Johnson (coordinator), Lisa Jones (coordinator), Chelsea Towers (coordinator). **Punzi Medical Center and Trinity Hypertension Research, Carrollton, TX:** Henry Punzi (PI), Kathy Cassidy (coordinator), Kristin Schumacher (coordinator). **Family Care Practice, Fajardo, Puerto Rico:** Carmen Irizarry (PI), Ilma Colon (coordinator). **Centro Cardiovascular de Caguas, El Verde, Caguas, Puerto Rico:** Pedro Colon-Ortiz (PI), Pedro Colon-Hernandez (Co-I), Merari Carrasquillo (coordinator), Nivea Vazquez (coordinator). **Miguel Sosa-Padilla, Private Practice San Juan, Puerto Rico:** Miguel Sosa-Padilla (PI), Alex Cintron-Pinero (Co-I), Mayra Ayala (coordinator), Olga Pacheco (coordinator), Catalina Rivera (coordinator) Irma Sotomayor-Gonzalez (coordinator). **Altamira Family Practice and**



**Research Institute Center, San Juan, Puerto Rico:** Jamie Claudio (PI), Jose Lazaro (coordinator), Migdalia Arce (coordinator), Lourdes Heres (coordinator), Alba Perez (coordinator). **Centro Clinico San Patricio, San Juan, Puerto Rico:** Jose Tavarez-Valle (PI), Ferlinda Arocho (coordinator), Mercedes Torres (coordinator), Melvaliz Vazquez (coordinator). **University of Massachusetts – Worcester, MA:** Gerard P. Aurigemma (PI), Rebecca Takis-Smith (Co-I), Julia Andrieni (Co-I), Noelle Bodkin (coordinator), Kiran Chaudhary (coordinator), Paula Hu (coordinator). **Rutgers-Robert Wood Johnson Medical School, New Brunswick, New Jersey:** John Kostis (PI), William J. Kostis (Co-PI) Nora Cosgrove (coordinator), Denise Bankowski (coordinator), Monica Boleyn (coordinator), Laurie Casazza (coordinator), Victoria Giresi (coordinator), Tosha Patel (coordinator), Erin Squindo (coordinator), Yan Wu (coordinator). **University of Mississippi Medical Center CRP – Jackson, MS:** Marion Wofford (PI), Michael Flessner (Co-I), Cathy Adair (coordinator). **Nashville Medical Group, Nashville, TN:** Jordan Asher (PI), Debbie Loope (coordinator), Rita Cobb (coordinator), Reiner Venegas (coordinator). **New York Irving Pavilion Research, Columbia University, New York, NY:** Thomas Bigger (Director), Daniel Donovan (PI), Carlos Lopez-Jimenez (Co-I), Amilcar Tirado (coordinator). **New York, Irving Pavilion Research Unit – CTSA Satellite, Columbia University, New York, NY:** Thomas Bigger (Director), Asqual Getaneh (PI), Rocky Tang (coordinator), Sabrina Durant (coordinator). **Clinical Cardiovascular Research Lab for the Elderly, Columbia University, New York, NY:** Thomas Bigger (Director), Mathew Maurer (PI), Sergio Teruya (Co-I) Stephen Helmke (coordinator), Julissa Alvarez (coordinator). **Medical University of South Carolina Nephrology, Charleston, SC:** Ruth Campbell (PI), Roberto Pisoni (Co-I), Rachel Sturdivant (Co-I), Caroline Counts (coordinator), Vickie Hunt (coordinator), Lori Spillers (coordinator). **Great Lakes Medical Research, Westfield, NY:** Donald Brautigam (PI), Timothy Kitchen (Co-I), Timothy Gorman (Co-I) Jessica Sayers (coordinator), Sarah Button (coordinator), June Chiarot (coordinator), Rosemary Fischer (coordinator), Melissa Lyon (coordinator), Maria Resnick (coordinator). **VA Network: New Mexico VA Healthcare System – Albuquerque, NM:** Karen Servilla (PI), Darlene Vigil (Co-I), Terry Barrett (coordinator). **Atlanta VAMC – Atlanta GA:** Mary Ellen Sweeney (PI), Rebecca Johnson (Co-I), Susan McConnell (Co-I), Khadijeh Shahid Salles (Co-I), Francoise Watson (Co-I), Cheryl Schenk (coordinator), Laura Whittington (coordinator), Maxine Maher (coordinator). **VA Boston Healthcare System – Jamaica Plain, MA:** Jonathan Williams (PI), Stephen Swartz (PI), Paul Conlin (Co-I), George Alexis (coordinator), Rebecca Lamkin (coordinator), Patti Underwood (coordinator), Helen Gomes (coordinator). **James J. Peters VAMC – Bronx, NY:** Clive Rosendorff (PI), Stephen Atlas (Co-I), Lawrence Kwon (Co-I), Matar Matar (coordinator). **Ralph H. Johnson VAMC – Charleston, SC:** Roberto Pisoni (PI), Jan Basile (PI), Joseph John (PI), Deborah Ham (coordinator), Hadi Baig (coordinator). **Dayton VAMC – Dayton, OH:** Mohammed Saklayen (PI), Jason Yap (Co-I), Helen Neff (coordinator), Carol Miller (coordinator), Ling Zheng-Phelan (coordinator). **John D. Dingell VAMC – Detroit, MI:** Saib Gappy (PI), Shiva Rau (Co-I), Arathi Raman (Co-I), Vicki Berchou (coordinator), Elizabeth Jones (coordinator), Erin Olgren (coordinator). **VA New Jersey Healthcare System – East Orange, NJ:** Michael Yudd (PI), Sithiporn Sastrasinh (PI), Jennine Michaud (Co-I), Jessica Fiore (coordinator), Marianne Kutza (coordinator). **Malcom Randall VAMC – Gainesville, FL:** Ronald Shorr (PI), Rattana Mount (Co-I), Jeremy Thoms (Co-I), Helen Dunn (coordinator), Susan Stinson (coordinator), Jessica Hunter (coordinator). **Michael E. DeBakey VAMC – Houston, TX:** Addison Taylor (PI), Jeffery Bates (Co-I), Catherine Anderson (coordinator). **G.V. (Sonny) Montgomery VAMC – Jackson, MS:** Kent Kirchner (PI), Jodi Stubbs (Co-I), Ardell Hinton (coordinator), Anita (Kaye) Spencer (coordinator). **Kansas City VAMC – Kansas City, MO:** Santosh Sharma (PI), Thomas Wiegmann (PI), Smita Mehta (coordinator). **John L. McClellan Memorial Veterans Hospital – Little Rock, AR:** Michelle Krause (PI), Kate Dishongh (coordinator). **Memphis VAMC – Memphis, TN:** Barry Wall (PI), Richard Childress (Co-I), William Cushman (Co-I), Geeta Gyamlani (Co-I), Atossa Niakan (Co-I), Cathy Thompson

(Co-I), Janelle Moody (coordinator). **Clement J. Zablocki VAMC – Milwaukee, WI:** Jeffrey Whittle (PI), Gary Barnas (Co-I), Dawn Wolfram, (Co-I), Heidi Cortese (coordinator), Jonette Johnson (coordinator). **Nashville VAMC/TVHS-GRECC – Nashville, TN:** Christianne Roumie (PI), Adriana Hung (Co-I), Jennifer Wharton (coordinator), Kurt Niesner (coordinator). **VA New York Harbor Healthcare System – New York, NY:** Lois Katz (PI), Elizabeth Richardson (coordinator), George Brock (coordinator). **Northport VAMC – Northport, NY:** Joanne Holland (PI), Troy Dixon (PI), Athena Zias (Co-I), Christine Spiller (coordinator). **Phoenix VA Healthcare System – Phoenix, AZ:** Penelope Baker (PI), James Felicetta (PI), Shakaib Rehman (Co-I), Kelli Bingham (coordinator). **Portland VAMC – Portland, OR:** Suzanne Watnick (PI), Jessica Weiss (Co-I), Tera Johnston (coordinator). **St. Louis VA Healthcare System – St. Louis, MO:** Stephen Giddings (PI), Andrew Klein (PI), Caroline Rowe (Co-I), Kristin Vargo (coordinator), Kristi Waidmann (coordinator). **Washington, D.C. VAMC – Washington, D.C.:** Vasilios Papademetriou (PI), Jean Pierre Elkhoury (Co-I), Barbara Gregory (coordinator), Susan Amodeo (coordinator), Mary Bloom (coordinator). **West Los Angeles VA Healthcare Center /Greater Los Angeles Healthcare System – Los Angeles, CA:** Dalia Goldfarb-Waysman (PI), Richard Treger (Co-I), Karen Knibloe (coordinator). **Minneapolis VAMC – Minneapolis, MN:** Areef Ishani (PI), Yelena Slinin (Co-I), Christine Olney (coordinator), Jacqueline Rust (coordinator). **Audie L. Murphy Memorial Veterans Hospital – South Texas Veterans Healthcare System – San Antonio, TX:** Paolo Fanti (PI), Shweta Bansal (Co-I), Monica Dunnam (Co-I), Christopher Dyer (Co-I), Lih-Lan Hu (coordinator), Perla Zarate-Abbott (coordinator).

**Acknowledgments.** The Systolic Blood Pressure Intervention Trial is funded with Federal funds from the National Institutes of Health (NIH), including the National Heart, Lung, and Blood Institute (NHLBI), the National Institute of Diabetes and Digestive and Kidney Diseases (NIDDK), the National Institute on Aging (NIA), and the National Institute of Neurological Disorders and Stroke (NINDS), under Contract Numbers HHSN268200900040C, HHSN268200900046C, HHSN268200900047C, HHSN268200900048C, HHSN268200900049C, and Inter-Agency Agreement Number A-HL-13-002-001. It was also supported in part with resources and use of facilities through the Department of Veterans Affairs. The SPRINT investigators acknowledge the contribution of study medications (azilsartan and azilsartan combined with chlorthalidone) from Takeda Pharmaceuticals International, Inc. All components of the SPRINT study protocol were designed and implemented by the investigators. The investigative team collected, analyzed, and interpreted the data. All aspects of manuscript writing and revision were carried out by the coauthors. The content is solely the responsibility of the authors and does not necessarily represent the official views of the NIH, the U.S. Department of Veterans Affairs, or the United States Government. For a full list of contributors to SPRINT, please see the supplementary acknowledgement list: ClinicalTrials.gov Identifier: NCT01206062.

We also acknowledge the support from the following CTSA's funded by NCATS: CWRU: UL1TR000439, OSU: UL1RR025755, U Penn: UL1RR024134& UL1TR000003, Boston: UL1RR025771, Stanford: UL1TR000093, Tufts: UL1RR025752, UL1TR000073 & UL1TR001064, University of Illinois: UL1TR000050, University of Pittsburgh: UL1TR000005, UT Southwestern: 9U54TR000017-06, University of Utah: UL1TR000105-05, Vanderbilt University: UL1 TR000445, George Washington University: UL1TR000075, University of CA, Davis: UL1 TR000002, University of Florida: UL1 TR000064, University of Michigan: UL1TR000433, Tulane University: P30GM103337 COBRE Award NIGMS.

Use of the MMAS is protected by US copyright laws. Permission for use is required. A license

agreement is available from Donald E. Morisky, 294 Lindura Court, Las Vegas, NV 89138-4632; [dmorisky@gmail.com](mailto:dmorisky@gmail.com).

Use of the VR-12 is protected by US copyright laws. Permission for use is required and is available through this Website: "About the VR-36©, VR-12© and VR-6D©" (Boston University); <http://www.bu.edu/sph/research/research-landing-page/vr-36-vr-12-and-vr-6d/about-the-vr-36-vr-12-and-vr-6d/>

## Supplementary Methods

### *Linear Mixed Modeling of Longitudinal Patient-Reported Outcomes*

To compare longitudinal change for the various patient reported outcomes (PRO), VR-12 Physical Component Summary Score (PCS), VR-12 Mental Component Summary Score (MCS), and PHQ-9) between the treatment groups, we estimated a linear mixed model assuming linear mean change over time within each treatment group. The model for  $Y_{ij}$  ( $j^{\text{th}}$  PRO measurement for  $i^{\text{th}}$  participant measured at time  $t_{ij}$  (in years)) is as follows:

$$Y_{ij} = \beta_0 + \beta_1 \text{Intensive}_i + \beta_2 t_{ij} + \beta_3 \text{Intensive}_i t_{ij} + b_{1i} + b_{2,c_i} + \varepsilon_{ij}$$

Where  $\text{Intensive}_i$  is the randomization assignment for the  $i^{\text{th}}$  participant (1=Intensive-treatment; 0=Standard-treatment),  $c_i$  denotes the clinic site for the  $i^{\text{th}}$  participant (participants were randomized at 102 clinic sites),  $b_{1i}$  is a subject specific random effect,  $b_{2,c_i}$  is a clinic-specific random effect, and  $\varepsilon_{ij}$  denotes the residual error component. Modeling was carried out using SAS PROC MIXED (SAS v9.4, Cary, NC). We utilized minimum variance quadratic unbiased estimation (method=MIVQUE0) and the denominator degrees of freedom for hypothesis tests of fixed effects were computed using the between-within method (ddfm=bw) (1).

### *Multiple Imputation Procedure for Missing Data*

We examined the influence of missing data on inference for the VR-12 PCS and MCS using multiple imputation. For these analyses, we excluded N=20 participants where the VR-12 was never completed at any point during the study. For the remaining participants, we imputed VR-12 scores where PRO assessments theoretically could have been collected. We therefore did not impute VR-12 scores subsequent to a participant's death, and we only imputed missing VR-

12 scores for annual visits scheduled to occur on or before the decision to stop the SPRINT intervention (target visit date + 45 days  $\leq$  8/20/2015, see Supplementary Table 1).

The multiple imputation procedure was implemented using *proc mi* and *proc mianalyze* in SAS v9.4 (SAS, Cary, NC), based on 100 imputed datasets. We used a two-step procedure for imputation due to the presence of both monotone and non-monotone missing data patterns. We first partially imputed missing PCS and MCS scores by treatment group using Markov Chain Monte Carlo, assuming multivariate normality (jointly for both PCS and MCS scores) and using Jeffrey's priors for the prior distribution of the mean and variance-covariance matrix. For this step, we used the *impute=monotone* option in *proc mi* so as to only impute enough data to produce monotone missing data patterns.

We then used a series of linear regression models to impute the remaining missing PCS and MCS scores, including treatment group, age, age by treatment group, sex, sex by treatment group, race/ethnicity (White, Black, Hispanic, or Other), number of antihypertensive agents at randomization (0, 1, 2, 3, or 4+), Montreal Cognitive Assessment (MoCA) Score at randomization (2), smoking status (Current, Former, or Never smoker), Body Mass Index (<25 kg/m<sup>2</sup>, 25 to <30 kg/m<sup>2</sup>, 30 kg/m<sup>2</sup> or greater), eGFR (<60 ml/min/1.73m<sup>2</sup> versus 60 ml/min/1.73m<sup>2</sup> or greater), systolic blood pressure at randomization, diastolic blood pressure at randomization, whether the PRO assessment followed a non-fatal primary cardiovascular event (Yes versus No, for post-baseline measurements), and PCS and MCS scores at the previous annual visit (for post-baseline measurements) as predictors. Non-fatal cardiovascular events included myocardial infarction, acute coronary syndrome not resulting in myocardial infarction, stroke, or acute decompensated heart failure. Similar to previous work with the SPRINT cohort, we categorized MoCA scores as <10<sup>th</sup> percentile, 10<sup>th</sup> percentile to <25<sup>th</sup> percentile,  $\geq$  25<sup>th</sup>

percentile, or missing (N=65) using normative data by age, sex, and education from the Irish Longitudinal Study on Ageing, with an adjustment for race/ethnicity (3,4).

The above imputation procedure entails the common assumption that any missing VR-12 scores are missing at random (MAR), conditional on the factors included in the imputation models. We evaluated sensitivity to the MAR assumption by deterministically shifting the imputed PCS and MCS scores for participants in the intensive-treatment group. Conceptually, this sensitivity analysis was designed to examine how sharply VR-12 scores would have needed to decline for participants in the intensive-treatment with missing data in order to suggest an overall deterioration in VR-12 scores due to intensive treatment. If we let  $Y_{ij}$  denote the imputed PCS or MCS score for the  $i^{th}$  participant missing that measure at time point  $j$  (based on the same imputation model described above under the MAR assumption), then this analysis simply defined a new imputed value,  $Y_{ij}^* = Y_{ij} - \delta$ , with  $\delta$  ranging from 1 to 4 points. Supplementary Figure 5 graphically depicts the implied trajectory of mean VR-12 scores for 1) participants with complete data, 2) participants with missing data under the MAR assumption, and 3) participants in the intensive-treatment group with shifted imputed values. When we assumed strong differential decreases in PCS and MCS scores for participants with missing data randomized to intensive therapy, we did observe statistically significant decreases on these measures for the intensive-treatment group (Supplementary Table 12). However, these assumptions for missing data still implied small differences in mean scores overall (<1 point over three years), and so are unlikely to be clinically meaningful.

**FIGURE S1.** Veterans RAND 12 Item Health Survey (VR-12) scores over the course of follow-up by treatment group and Mental Comorbidity Category

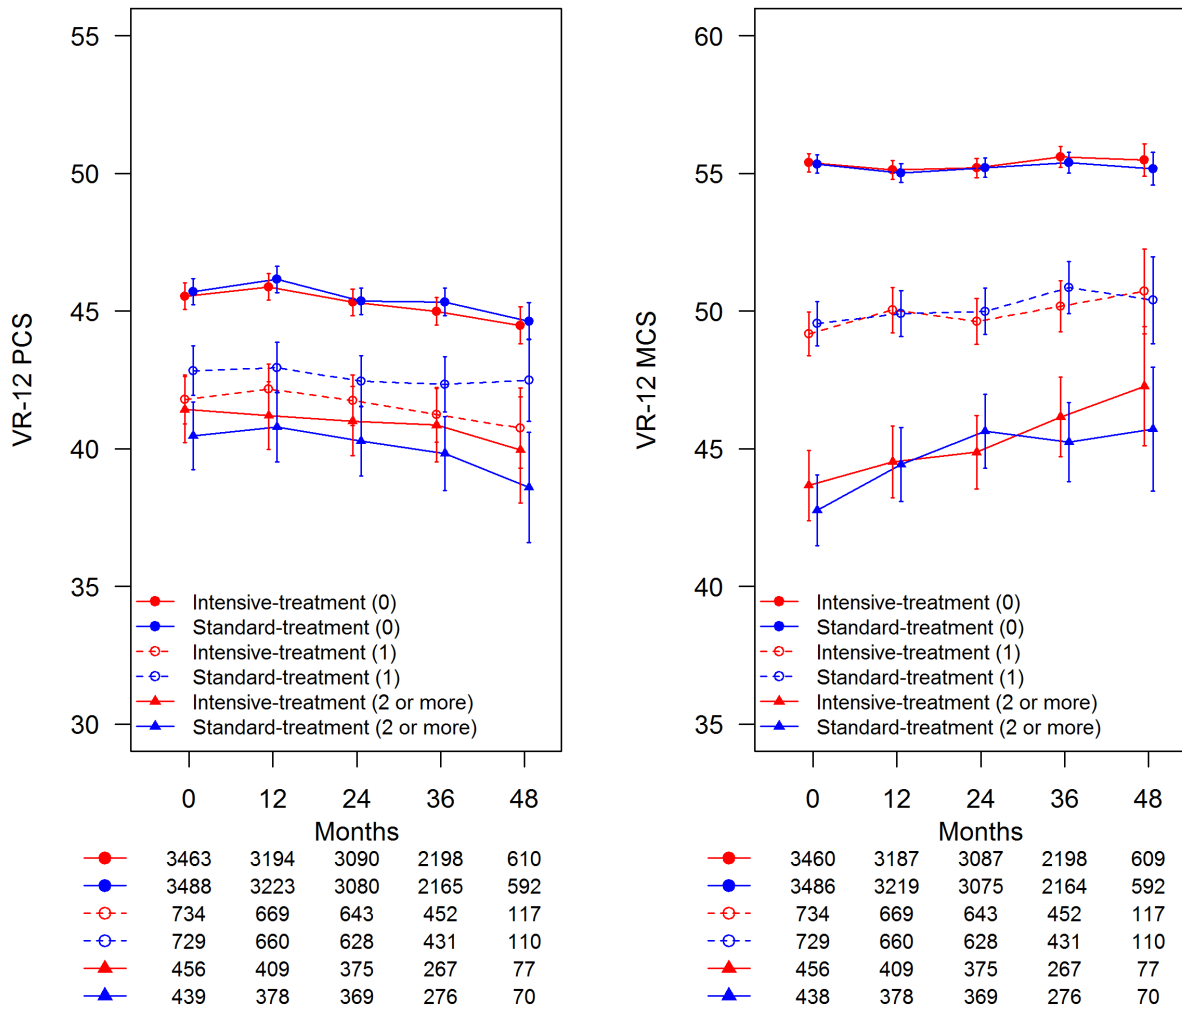

Mental comorbidity burden was categorized as 0, 1, or 2 or more comorbidities. Points represent estimated mean based on mixed model, with bars denoting 95% Confidence Intervals. Counts below figures denote number of participants assessed at each study visit within each treatment group and comorbidity subgroup. PCS denotes Physical Component Summary Score and MCS Mental Component Summary Score.

**FIGURE S2.** Veterans RAND 12 Item Health Survey (VR-12) scores over the course of follow-up by treatment group and baseline Physical Component Summary Score (PCS)

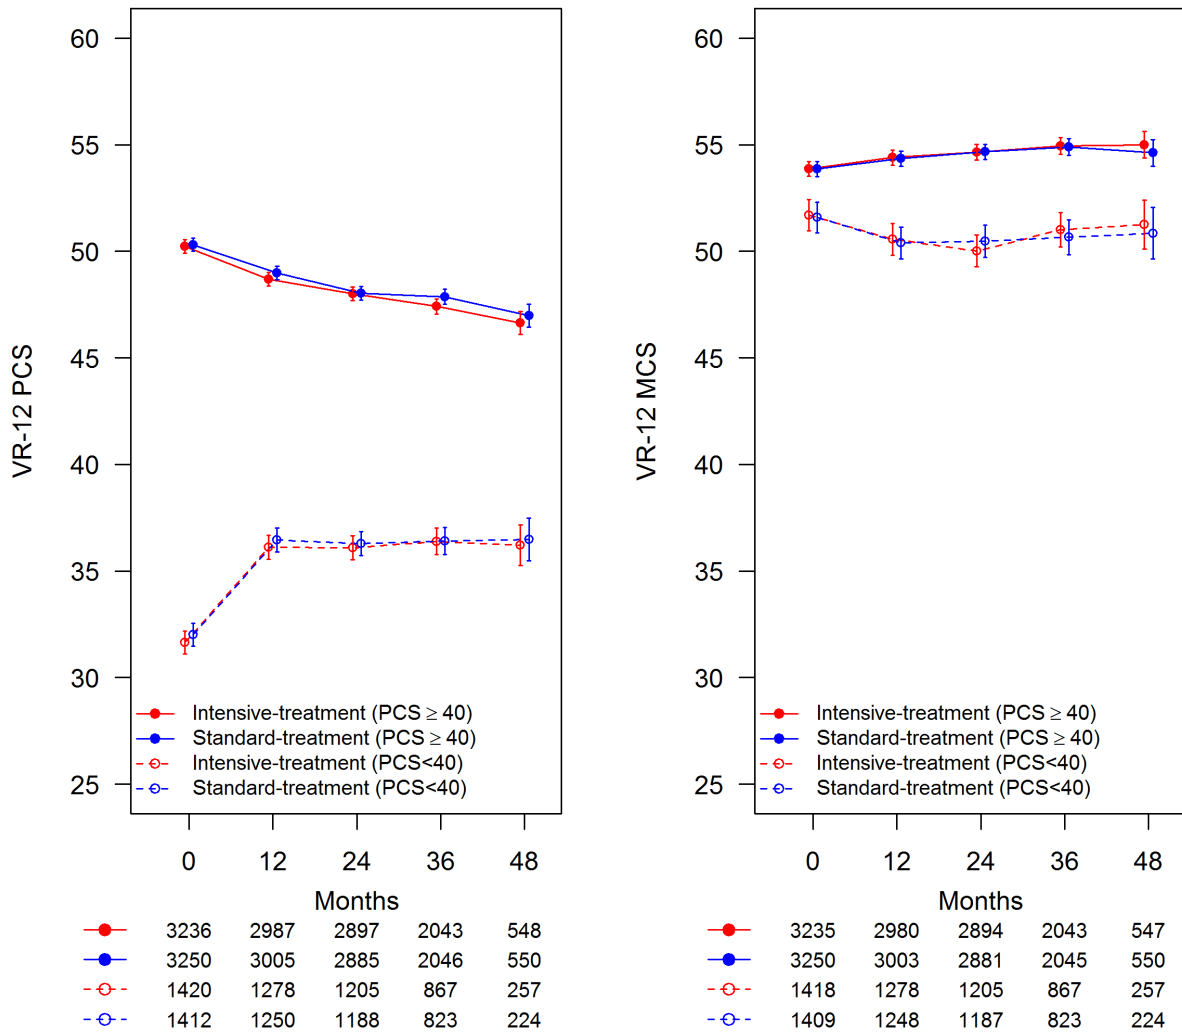

Points represent estimated mean based on mixed model, with bars denoting 95% Confidence Intervals. Counts below figures denote number of participants assessed at each study visit within each treatment group and comorbidity subgroup. MCS denotes Mental Component Summary Score.



**FIGURE S3.** Veterans RAND 12 Item Health Survey (VR-12) scores over the course of follow-up by treatment group and cognitive status

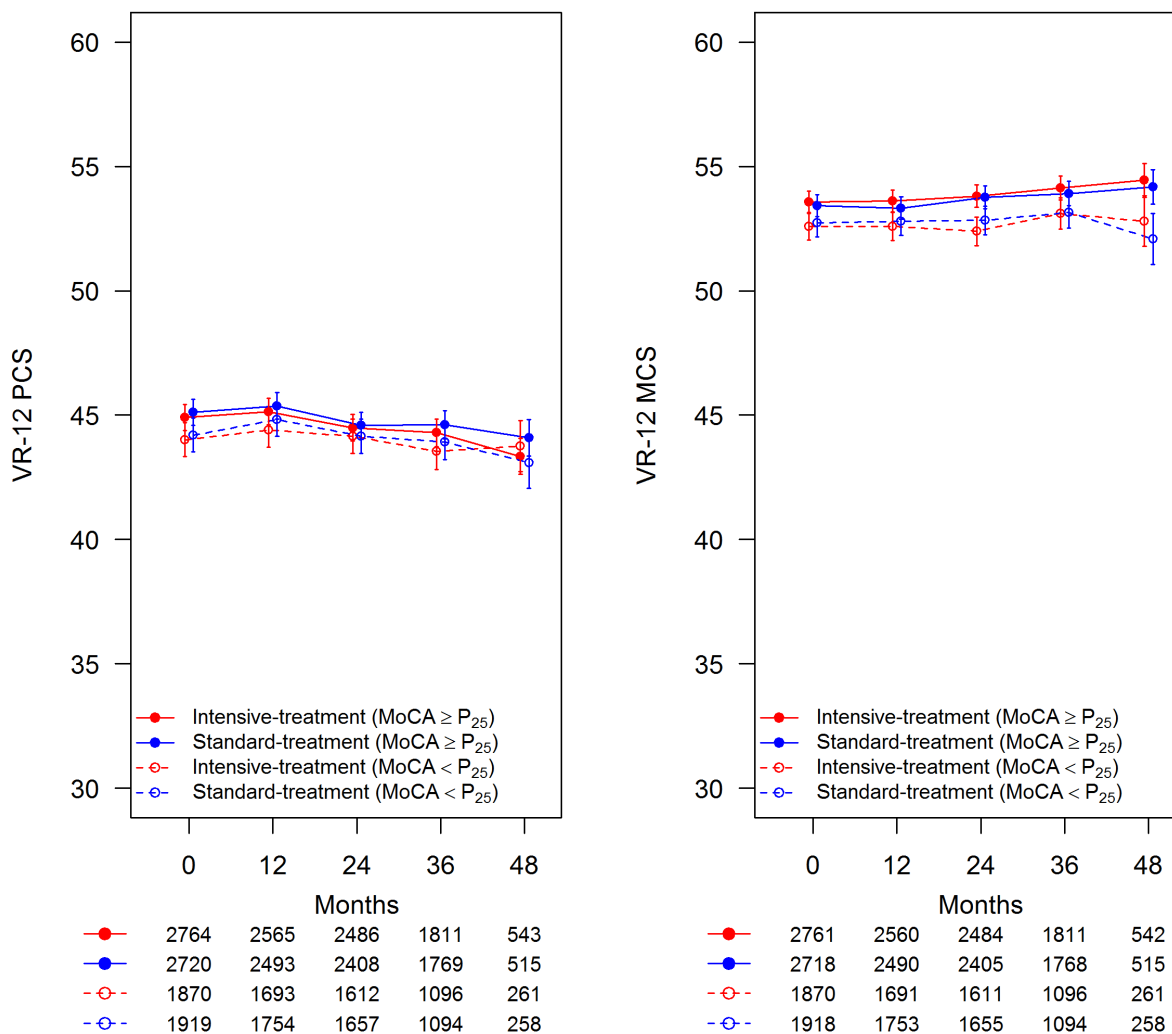

Points represent estimated mean based on mixed model, with bars denoting 95% Confidence Intervals. Counts below figures denote number of participants assessed at each study visit within each treatment group and comorbidity subgroup. PCS denotes Physical Component Summary Score, MCS Mental Component Summary Score, MoCA Montreal Cognitive Assessment, and P<sub>25</sub> Age and education specific normative 25<sup>th</sup> percentile from the Irish Longitudinal Study of Ageing (two points added to the scores of Black and Hispanic participants in SPRINT).

**FIGURE S4.** Veterans RAND 12 Item Health Survey (VR-12) scores over the course of follow-up by treatment group and frailty status

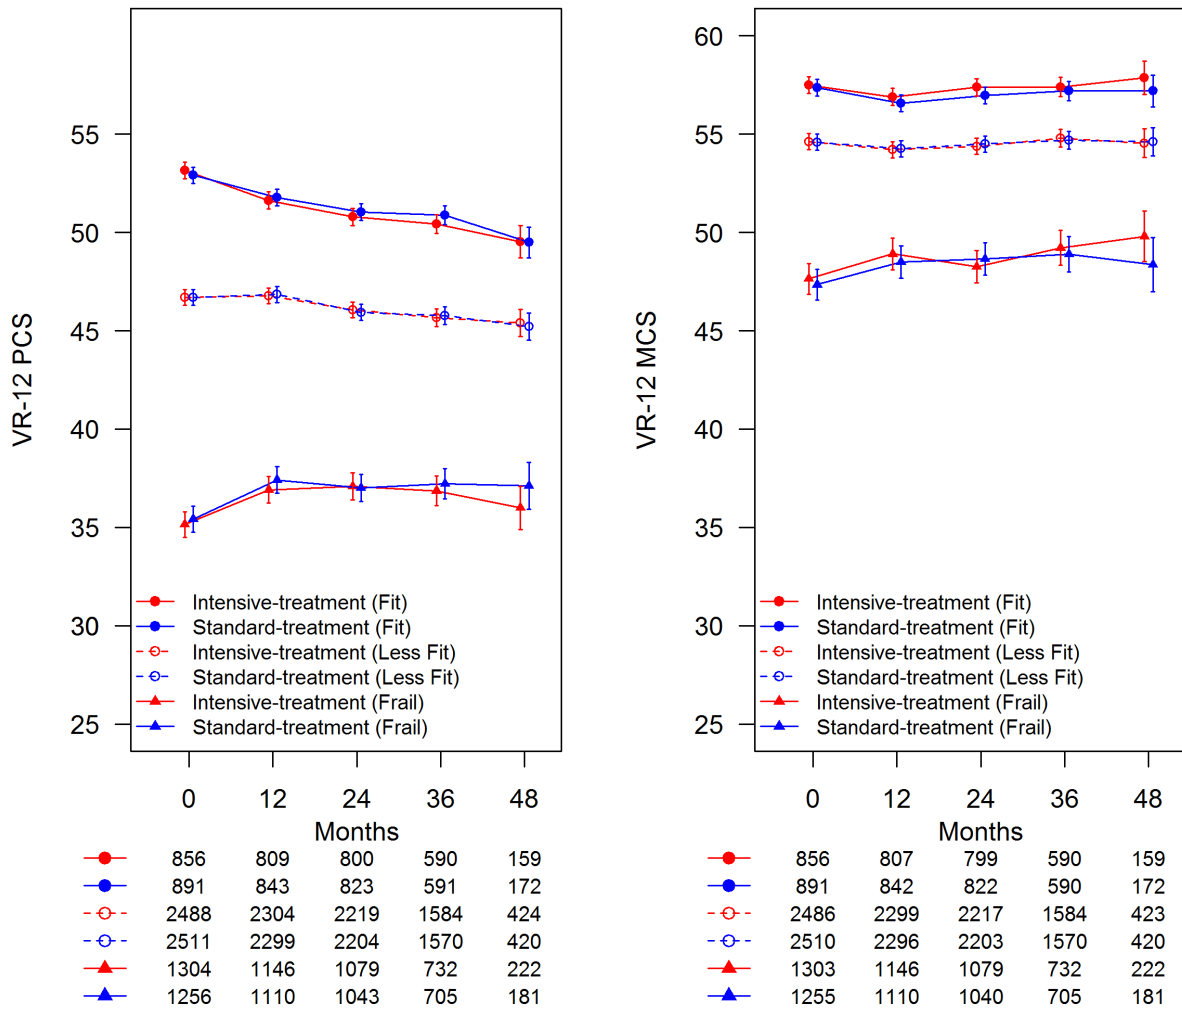

Points represent estimated mean based on mixed model, with bars denoting 95% Confidence Intervals. Counts below figures denote number of participants assessed at each study visit within each treatment group and comorbidity subgroup. PCS denotes Physical Component Summary Score, MCS Mental Component Summary Score, and FI Frailty Index. FI scores range from 0 to 1, with higher scores denoting greater frailty.

**FIGURE S5.** Mean scores on the Veteran's RAND 12-Item Survey (VR-12) for participants with complete data versus those with missing data

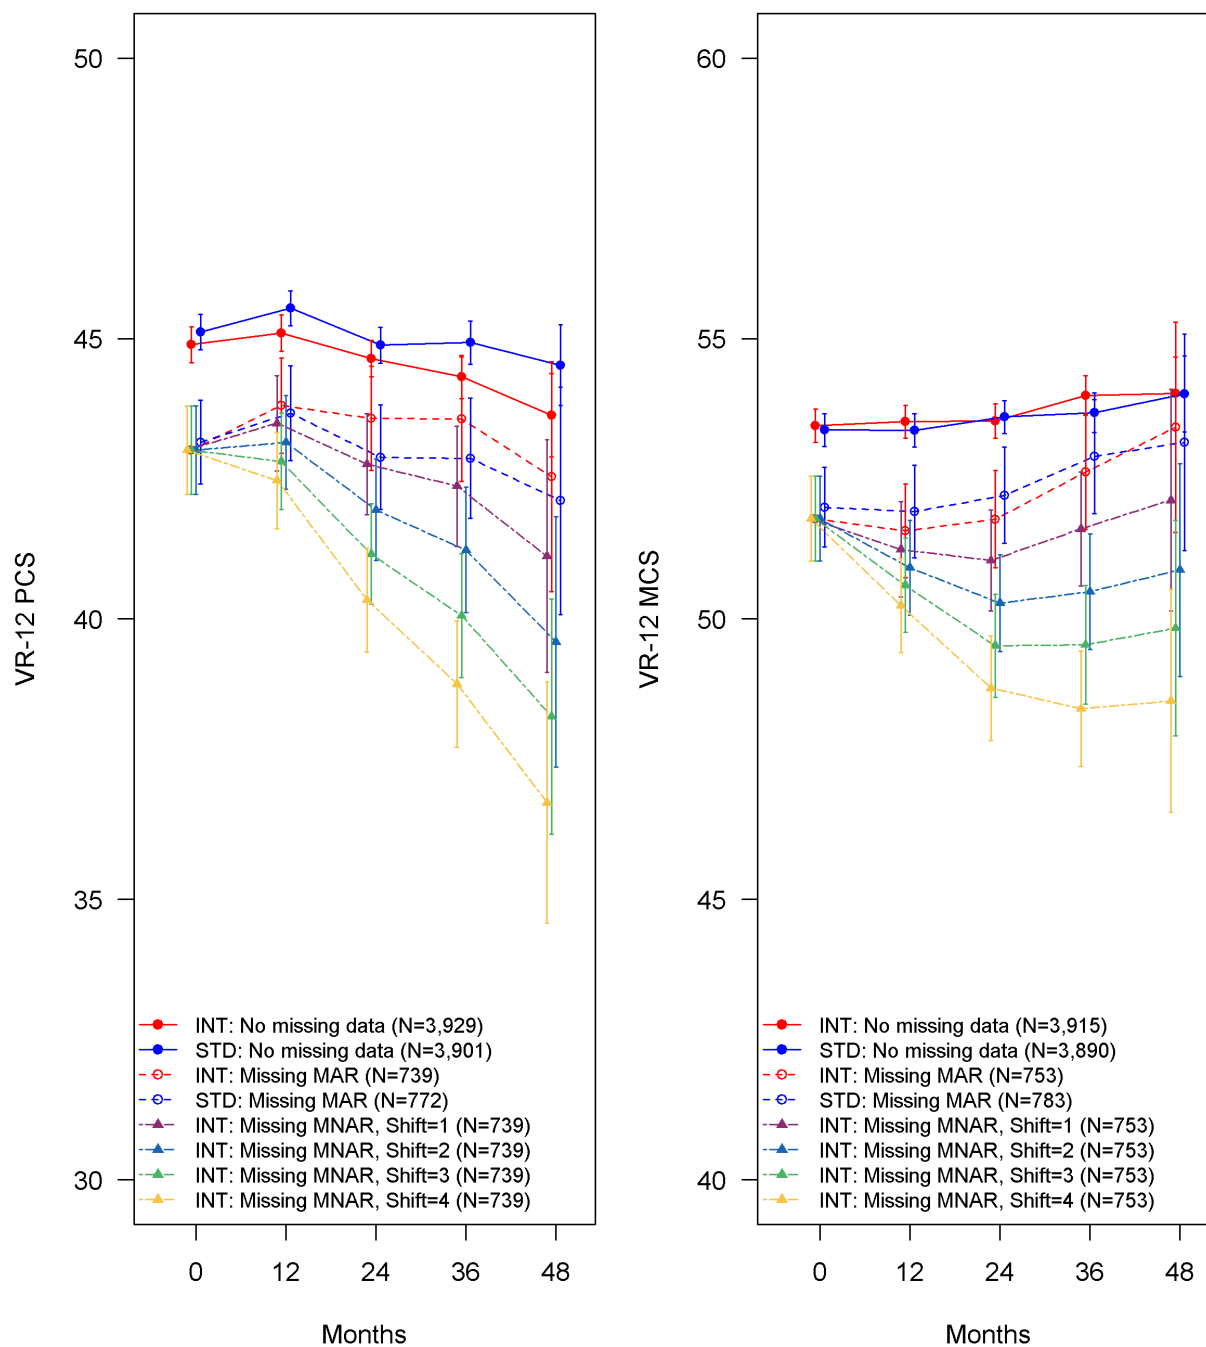

INT denotes Intensive-treatment, STD Standard-treatment, MAR Missing at Random, MNAR Missing Not at Random, PCS Physical Component Summary Score, and MCS Mental Component Summary Score. Points represent estimated mean based on mixed model, with bars denoting 95% Confidence Intervals. For participants with missing data, mean scores reflect values averaged over 100 imputed datasets.

**TABLE S1.** Completion of Veterans RAND 12 Item Health Survey (VR-12) by study visit

|                                                       | Visit    | Follow-up through 8/20/2015                |                                           | Follow-up through 12/01/2015               |                                           |
|-------------------------------------------------------|----------|--------------------------------------------|-------------------------------------------|--------------------------------------------|-------------------------------------------|
|                                                       |          | Intensive-treatment<br>no. / total no. (%) | Standard-treatment<br>no. / total no. (%) | Intensive-treatment<br>no. / total no. (%) | Standard-treatment<br>no. / total no. (%) |
| <b>VR-12 Physical<br/>Component<br/>Summary Score</b> | Baseline | 4657 / 4678 (99.6)                         | 4662 / 4683 (99.6)                        | 4657 / 4678 (99.6)                         | 4662 / 4683 (99.6)                        |
|                                                       | 12M      | 4276 / 4641 (92.1)                         | 4266 / 4640 (91.9)                        | 4276 / 4641 (92.1)                         | 4266 / 4640 (91.9)                        |
|                                                       | 24M      | 4112 / 4594 (89.5)                         | 4083 / 4583 (89.1)                        | 4112 / 4594 (89.5)                         | 4083 / 4583 (89.1)                        |
|                                                       | 36M      | 2919 / 3305 (88.3)                         | 2877 / 3289 (87.5)                        | 3491 / 3971 (87.9)                         | 3434 / 3938 (87.2)                        |
|                                                       | 48M      | 805 / 919 (87.6)                           | 774 / 880 (88.0)                          | 1287 / 1482 (86.8)                         | 1278 / 1463 (87.4)                        |
|                                                       | Visit    | no. / total no. (%)                        | no. / total no. (%)                       | no. / total no. (%)                        | no. / total no. (%)                       |
| <b>VR-12 Mental<br/>Component<br/>Summary Score</b>   | Baseline | 4654 / 4678 (99.5)                         | 4659 / 4683 (99.5)                        | 4654 / 4678 (99.5)                         | 4659 / 4683 (99.5)                        |
|                                                       | 12M      | 4269 / 4641 (92.0)                         | 4262 / 4640 (91.9)                        | 4269 / 4641 (92.0)                         | 4262 / 4640 (91.9)                        |
|                                                       | 24M      | 4109 / 4594 (89.4)                         | 4078 / 4583 (89.0)                        | 4109 / 4594 (89.4)                         | 4078 / 4583 (89.0)                        |
|                                                       | 36M      | 2919 / 3305 (88.3)                         | 2876 / 3289 (87.4)                        | 3491 / 3971 (87.9)                         | 3433 / 3938 (87.2)                        |
|                                                       | 48M      | 804 / 919 (87.5)                           | 774 / 880 (88.0)                          | 1286 / 1482 (86.8)                         | 1277 / 1463 (87.3)                        |

M denotes months. Total no. reflects the number of annual VR-12 assessments scheduled to occur on or before follow-up cutoff date (target visit date + 45 days ≤ follow-up cutoff date), removing scheduled visits following a participant's death.

**TABLE S2.** Additional baseline characteristics of study participants

|                                                   | <b>Intensive-treatment</b> | <b>Standard-treatment</b> |
|---------------------------------------------------|----------------------------|---------------------------|
| <b>Characteristic</b>                             | <b>N=4678</b>              | <b>N=4683</b>             |
| <b>Female sex - no. (%)</b>                       | 1684 (36)                  | 1648 (35.2)               |
| <b>Age - years</b>                                | 67.9 ± 9.4                 | 67.9 ± 9.5                |
| <b>Systolic blood pressure - mm Hg</b>            | 139.7 ± 15.8               | 139.7 ± 15.4              |
| <b>Diastolic blood pressure - mm Hg</b>           | 78.2 ± 11.9                | 78.0 ± 12.0               |
| <b>Antihypertensive agents - no./patient</b>      | 1.8 ± 1.0                  | 1.8 ± 1.0                 |
| <b>Taking ≥1 antihypertensive agent - no. (%)</b> | 4246 (90.8)                | 4233 (90.4)               |
| <b>Race or ethnic group - no. (%)†</b>            |                            |                           |
| <b>Non-Hispanic white</b>                         | 2698 (57.7)                | 2701 (57.7)               |
| <b>Non-Hispanic black</b>                         | 1379 (29.5)                | 1423 (30.4)               |
| <b>Hispanic</b>                                   | 503 (10.8)                 | 481 (10.3)                |
| <b>Other</b>                                      | 98 (2.1)                   | 78 (1.7)                  |
| <b>Body-mass index - kg/m<sup>2</sup></b>         | 29.9 ± 5.8                 | 29.8 ± 5.7                |
| <b>Education - no. (%)</b>                        |                            |                           |
| <b>&lt;High School</b>                            | 431 (9.2)                  | 445 (9.5)                 |
| <b>High School graduate</b>                       | 2447 (52.3)                | 2386 (51.0)               |
| <b>College graduate</b>                           | 1024 (21.9)                | 1065 (22.7)               |
| <b>Graduate degree</b>                            | 767 (16.4)                 | 779 (16.6)                |
| <b>Missing data</b>                               | 9 (0.2)                    | 8 (0.2)                   |
| <b>Smoking status - no. (%)</b>                   |                            |                           |
| <b>Never smoker</b>                               | 2050 (43.8)                | 2072 (44.2)               |
| <b>Former smoker</b>                              | 1977 (42.3)                | 1996 (42.6)               |
| <b>Current smoker</b>                             | 639 (13.7)                 | 601 (12.8)                |
| <b>Missing data</b>                               | 12 (0.3)                   | 14 (0.3)                  |
| <b>Alcohol use - no. (%)‡</b>                     |                            |                           |
| <b>Non-drinker</b>                                | 2072 (44.3)                | 2069 (44.2)               |
| <b>Light drinker</b>                              | 938 (20.1)                 | 981 (20.9)                |
| <b>Moderate drinker</b>                           | 890 (19.0)                 | 858 (18.3)                |

|                                                                       |                       |                       |
|-----------------------------------------------------------------------|-----------------------|-----------------------|
| <b>Heavy drinker</b>                                                  | 538 (11.5)            | 553 (11.8)            |
| <b>Missing data</b>                                                   | 240 (5.1)             | 222 (4.7)             |
| <b>History of cardiovascular disease - no. (%)</b>                    | 940 (20.1)            | 937 (20.0)            |
| <b>Serum creatinine - mg/dl, median (IQR)</b>                         | 1 (0.9 to 1.2)        | 1.0 (0.9 to 1.2)      |
| <b>Estimated GFR - ml/min/1.73 m<sup>2</sup></b>                      | 71.8 ± 20.7           | 71.7 ± 20.5           |
| <b>Estimated GFR &lt;60 ml/min/1.73 m<sup>2</sup> - no. (%)</b>       | 1330 (28.6)           | 1316 (28.3)           |
| <b>Estimated GFR &lt;45 ml/min/1.73 m<sup>2</sup> - no. (%)</b>       | 445 (9.6)             | 444 (9.5)             |
| <b>Ratio of urinary albumin (mg) to creatinine (g) - median (IQR)</b> | 9.6 (5.7 to 21.1)     | 9.4 (5.6 to 21.8)     |
| <b>Fasting total cholesterol - mg/dl</b>                              | 190.2 ± 41.4          | 190.0 ± 40.9          |
| <b>Fasting HDL cholesterol - mg/dl</b>                                | 52.9 ± 14.3           | 52.8 ± 14.6           |
| <b>Fasting total triglycerides - mg/dl, median (IQR)</b>              | 106.5 (76.0 to 148.0) | 107.0 (77.0 to 152.0) |
| <b>Fasting plasma glucose - mg/dl</b>                                 | 98.8 ± 13.7           | 98.8 ± 13.4           |
| <b>Statin use - no./total no. (%)</b>                                 | 1978 / 4645 (42.6)    | 2076 / 4640 (44.7)    |
| <b>Aspirin use - no/total no. (%)</b>                                 | 2406 / 4661 (51.6)    | 2350 / 4666 (50.4)    |
| <b>Antidepressant use - no. (%)</b>                                   | 588 (12.7)            | 605 (13.0)            |

Plus-minus values are means ± SD. There were no significant differences (p-value<0.05) between the two treatment groups except for statin use (p=0.04). To convert the values for creatinine to micromoles per liter, multiply by 88.4. To convert the values for cholesterol to millimoles per liter, multiply by 0.02586. To convert the values for triglycerides to millimoles per liter, multiply by 0.01129. To convert the values for glucose to millimoles per liter, multiply by 0.0551. IQR denotes interquartile range, GFR glomerular filtration rate, HDL high-density lipoprotein.

† Race and ethnic group were self-reported.

‡ Non-drinker denotes <1 drink per month, light drinker 1-2 drinks per week, moderate drinker ≥3 drinks per weeks but <1 drink per day, and heavy drinker (≥1 drink per day).

**TABLE S3.** Mean annual change in score on the Veterans RAND 12-item Health Survey (VR-12) Physical Component Summary Score (PCS) overall and by subgroups.

| Group                                      | Intensive-treatment<br>Mean change/yr (95% CI)* | Standard-treatment<br>Mean change/yr (95% CI)* | Intensive - Standard<br>Difference (95% CI)* | p-value | Interaction<br>p-value |
|--------------------------------------------|-------------------------------------------------|------------------------------------------------|----------------------------------------------|---------|------------------------|
| <b>All</b>                                 | -0.234 (-0.313, -0.155)                         | -0.227 (-0.306, -0.147)                        | -0.008 (-0.120, 0.105)                       | 0.90    |                        |
| <b>Medical comorbidity index</b>           |                                                 |                                                |                                              |         | 0.18                   |
| Two or less                                | -0.407 (-0.545, -0.269)                         | -0.252 (-0.386, -0.117)                        | -0.155 (-0.348, 0.037)                       | 0.11    |                        |
| Three or four                              | -0.148 (-0.288, -0.009)                         | -0.294 (-0.436, -0.151)                        | 0.145 (-0.054, 0.345)                        | 0.15    |                        |
| Five or six                                | -0.194 (-0.366, -0.022)                         | -0.244 (-0.423, -0.066)                        | 0.051 (-0.197, 0.298)                        | 0.69    |                        |
| Seven or more                              | -0.181 (-0.385, 0.022)                          | -0.068 (-0.268, 0.133)                         | -0.114 (-0.399, 0.172)                       | 0.43    |                        |
| <b>Mental comorbidity index</b>            |                                                 |                                                |                                              |         | 0.90                   |
| Zero                                       | -0.237 (-0.326, -0.148)                         | -0.226 (-0.316, -0.136)                        | -0.011 (-0.138, 0.116)                       | 0.86    |                        |
| One                                        | -0.207 (-0.417, 0.003)                          | -0.170 (-0.383, 0.044)                         | -0.038 (-0.337, 0.262)                       | 0.81    |                        |
| Two or more                                | -0.245 (-0.529, 0.040)                          | -0.303 (-0.590, -0.016)                        | 0.058 (-0.346, 0.462)                        | 0.78    |                        |
| <b>Baseline VR-12 PCS</b>                  |                                                 |                                                |                                              |         | 0.29                   |
| ≥40                                        | -0.915 (-0.998, -0.832)                         | -0.850 (-0.934, -0.767)                        | -0.065 (-0.182, 0.053)                       | 0.28    |                        |
| <40                                        | 1.341 (1.185, 1.497)                            | 1.280 (1.120, 1.440)                           | 0.061 (-0.162, 0.284)                        | 0.59    |                        |
| <b>Age</b>                                 |                                                 |                                                |                                              |         | 0.44                   |
| <75 years                                  | -0.145 (-0.237, -0.053)                         | -0.159 (-0.252, -0.066)                        | 0.014 (-0.116, 0.145)                        | 0.83    |                        |
| 75 years or older                          | -0.522 (-0.681, -0.364)                         | -0.433 (-0.591, -0.274)                        | -0.089 (-0.313, 0.135)                       | 0.43    |                        |
| <b>Cognitive status†</b>                   |                                                 |                                                |                                              |         | 0.38                   |
| MoCA≥normative 25 <sup>th</sup> percentile | -0.303 (-0.401, -0.205)                         | -0.256 (-0.356, -0.157)                        | -0.046 (-0.186, 0.093)                       | 0.51    |                        |
| MoCA<normative 25 <sup>th</sup> percentile | -0.121 (-0.255, 0.013)                          | -0.179 (-0.312, -0.046)                        | 0.058 (-0.13, 0.247)                         | 0.54    |                        |
| <b>Frailty status ‡</b>                    |                                                 |                                                |                                              |         | 0.49                   |
| Fit (FI≤0.10)                              | -0.910 (-1.046, -0.774)                         | -0.744 (-0.878, -0.610)                        | -0.166 (-0.357, 0.024)                       | 0.09    |                        |
| Less Fit (0.10<FI≤0.21)                    | -0.369 (-0.474, -0.264)                         | -0.381 (-0.486, -0.275)                        | 0.011 (-0.137, 0.160)                        | 0.88    |                        |
| Frail (FI>0.21)                            | 0.461 (0.289, 0.633)                            | 0.488 (0.311, 0.666)                           | -0.028 (-0.275, 0.219)                       | 0.83    |                        |

\*Estimates from linear mixed model assuming linear change over time. † Based on age and education specific normative data from the Irish Longitudinal Study of Ageing, with two points added to the scores of Black and Hispanic participants. ‡ Frailty Index scores

range from 0 to 1, with higher scores denoting greater frailty. CI denotes Confidence Interval, MoCA Montreal Cognitive Assessment, and FI Frailty Index



**TABLE S4.** Mean annual change in score on the Veterans RAND 12-item Health Survey (VR-12) Mental Component Summary Score (MCS) overall and by subgroups.

| Group                                      | Intensive-treatment<br>Mean change/yr (95% CI)* | Standard-treatment<br>Mean change/yr (95% CI)* | Intensive - Standard<br>Difference (95% CI)* | p-value | Interaction<br>p-value |
|--------------------------------------------|-------------------------------------------------|------------------------------------------------|----------------------------------------------|---------|------------------------|
| <b>All</b>                                 | 0.154 (0.069, 0.239)                            | 0.137 (0.051, 0.222)                           | 0.017 (-0.104, 0.137)                        | 0.79    |                        |
| <b>Medical comorbidity index</b>           |                                                 |                                                |                                              |         | 0.49                   |
| Two or less                                | 0.207 (0.049, 0.365)                            | 0.266 (0.112, 0.421)                           | -0.059 (-0.281, 0.162)                       | 0.60    |                        |
| Three or four                              | 0.267 (0.119, 0.415)                            | 0.304 (0.153, 0.455)                           | -0.037 (-0.249, 0.174)                       | 0.73    |                        |
| Five or six                                | 0.174 (-0.007, 0.354)                           | -0.015 (-0.203, 0.173)                         | 0.188 (-0.072, 0.449)                        | 0.16    |                        |
| Seven or more                              | -0.179 (-0.389, 0.032)                          | -0.203 (-0.41, 0.004)                          | 0.024 (-0.271, 0.319)                        | 0.87    |                        |
| <b>Mental comorbidity index</b>            |                                                 |                                                |                                              |         | 0.76                   |
| Zero                                       | 0.045 (-0.046, 0.137)                           | 0.004 (-0.088, 0.095)                          | 0.042 (-0.088, 0.171)                        | 0.53    |                        |
| One                                        | 0.281 (0.040, 0.521)                            | 0.329 (0.084, 0.574)                           | -0.048 (-0.391, 0.295)                       | 0.78    |                        |
| Two or more                                | 0.792 (0.459, 1.125)                            | 0.850 (0.514, 1.186)                           | -0.058 (-0.530, 0.415)                       | 0.81    |                        |
| <b>Baseline VR-12 PCS</b>                  |                                                 |                                                |                                              |         | 0.98                   |
| ≥40                                        | 0.325 (0.230, 0.420)                            | 0.296 (0.201, 0.391)                           | 0.029 (-0.105, 0.164)                        | 0.67    |                        |
| <40                                        | -0.245 (-0.419, -0.072)                         | -0.267 (-0.445, -0.088)                        | 0.021 (-0.228, 0.270)                        | 0.87    |                        |
| <b>Age</b>                                 |                                                 |                                                |                                              |         | 0.29                   |
| <75 years                                  | 0.268 (0.169, 0.367)                            | 0.292 (0.193, 0.392)                           | -0.025 (-0.165, 0.116)                       | 0.73    |                        |
| 75 years or older                          | -0.178 (-0.345, -0.011)                         | -0.299 (-0.466, -0.132)                        | 0.121 (-0.115, 0.357)                        | 0.31    |                        |
| <b>Cognitive status†</b>                   |                                                 |                                                |                                              |         | 0.79                   |
| MoCA≥normative 25 <sup>th</sup> percentile | 0.197 (0.093, 0.300)                            | 0.191 (0.086, 0.296)                           | 0.005 (-0.142, 0.152)                        | 0.94    |                        |
| MoCA<normative 25 <sup>th</sup> percentile | 0.085 (-0.061, 0.232)                           | 0.045 (-0.101, 0.191)                          | 0.040 (-0.167, 0.247)                        | 0.70    |                        |
| <b>Frailty status ‡</b>                    |                                                 |                                                |                                              |         | 0.91                   |
| Fit (FI≤0.10)                              | 0.049 (-0.093, 0.191)                           | -0.028 (-0.168, 0.112)                         | 0.077 (-0.122, 0.276)                        | 0.45    |                        |
| Less Fit (0.10<FI≤0.21)                    | 0.030 (-0.082, 0.142)                           | 0.033 (-0.079, 0.145)                          | -0.002 (-0.160, 0.156)                       | 0.98    |                        |
| Frail (FI>0.21)                            | 0.426 (0.232, 0.621)                            | 0.428 (0.226, 0.629)                           | -0.001 (-0.281, 0.279)                       | 0.99    |                        |

\*Estimates from linear mixed model assuming linear change over time. † Based on age and education specific normative data from the Irish Longitudinal Study of Ageing, with two points added to the scores of Black and Hispanic participants. ‡ Frailty Index scores

range from 0 to 1, with higher scores denoting greater frailty. CI denotes Confidence Interval, PCS Physical Component Summary Score, MoCA Montreal Cognitive Assessment, and FI Frailty Index

**TABLE S5.** Mean annual change in score on the Patient Health Questionnaire (PHQ-9) overall and by subgroups.

| Group                                      | Intensive-treatment<br>Mean change/yr (95% CI)* | Standard-treatment<br>Mean change/yr (95% CI)* | Intensive - Standard<br>Difference (95% CI)* | p-value | Interaction<br>p-value |
|--------------------------------------------|-------------------------------------------------|------------------------------------------------|----------------------------------------------|---------|------------------------|
| <b>All</b>                                 | -0.030 (-0.062, 0.001)                          | -0.034 (-0.066, -0.003)                        | 0.004 (-0.041, 0.049)                        | 0.86    |                        |
| <b>Medical comorbidity index</b>           |                                                 |                                                |                                              |         | 0.59                   |
| Two or less                                | -0.025 (-0.082, 0.032)                          | -0.038 (-0.094, 0.017)                         | 0.014 (-0.066, 0.093)                        | 0.73    |                        |
| Three or four                              | -0.098 (-0.153, -0.043)                         | -0.067 (-0.123, -0.010)                        | -0.032 (-0.110, 0.047)                       | 0.43    |                        |
| Five or six                                | -0.019 (-0.085, 0.047)                          | -0.015 (-0.084, 0.054)                         | -0.004 (-0.100, 0.091)                       | 0.93    |                        |
| Seven or more                              | 0.076 (-0.008, 0.160)                           | 0.016 (-0.066, 0.099)                          | 0.060 (-0.058, 0.178)                        | 0.32    |                        |
| <b>Mental comorbidity index</b>            |                                                 |                                                |                                              |         | 0.66                   |
| Zero                                       | 0.020 (-0.011, 0.051)                           | 0.027 (-0.004, 0.058)                          | -0.007 (-0.051, 0.037)                       | 0.75    |                        |
| One                                        | -0.088 (-0.186, 0.009)                          | -0.116 (-0.215, -0.017)                        | 0.027 (-0.111, 0.166)                        | 0.70    |                        |
| Two or more                                | -0.336 (-0.490, -0.182)                         | -0.386 (-0.541, -0.230)                        | 0.050 (-0.170, 0.269)                        | 0.66    |                        |
| <b>Baseline VR-12 PCS</b>                  |                                                 |                                                |                                              |         | 0.59                   |
| ≥40                                        | 0.019 (-0.014, 0.051)                           | 0.022 (-0.010, 0.054)                          | -0.004 (-0.049, 0.042)                       | 0.87    |                        |
| <40                                        | -0.142 (-0.214, -0.069)                         | -0.165 (-0.239, -0.091)                        | 0.023 (-0.080, 0.127)                        | 0.66    |                        |
| <b>Age</b>                                 |                                                 |                                                |                                              |         | 0.68                   |
| <75 years                                  | -0.089 (-0.128, -0.051)                         | -0.089 (-0.128, -0.051)                        | 0.000 (-0.054, 0.054)                        | 1.00    |                        |
| 75 years or older                          | 0.146 (0.090, 0.201)                            | 0.123 (0.068, 0.179)                           | 0.022 (-0.056, 0.101)                        | 0.58    |                        |
| <b>Cognitive status†</b>                   |                                                 |                                                |                                              |         | 0.70                   |
| MoCA≥normative 25 <sup>th</sup> percentile | -0.039 (-0.077, -0.001)                         | -0.034 (-0.073, 0.004)                         | -0.005 (-0.059, 0.050)                       | 0.87    |                        |
| MoCA<normative 25 <sup>th</sup> percentile | -0.018 (-0.073, 0.037)                          | -0.031 (-0.086, 0.023)                         | 0.013 (-0.064, 0.091)                        | 0.73    |                        |
| <b>Frailty status ‡</b>                    |                                                 |                                                |                                              |         | 0.69                   |
| Fit (FI≤0.10)                              | 0.082 (0.040, 0.125)                            | 0.113 (0.071, 0.155)                           | -0.030 (-0.090, 0.030)                       | 0.32    |                        |
| Less Fit (0.10<FI≤0.21)                    | 0.036 (-0.001, 0.073)                           | 0.024 (-0.013, 0.061)                          | 0.012 (-0.04, 0.065)                         | 0.65    |                        |
| Frail (FI>0.21)                            | -0.224 (-0.308, -0.141)                         | -0.255 (-0.342, -0.169)                        | 0.031 (-0.089, 0.151)                        | 0.61    |                        |

\*Estimates from linear mixed model assuming linear change over time. † Based on age and education specific normative data from the Irish Longitudinal Study of Ageing, with two points added to the scores of Black and Hispanic participants. ‡ Frailty Index scores range from 0 to 1, with higher scores denoting greater frailty. CI denotes Confidence Interval, PCS Physical Component Summary Score, MoCA Montreal Cognitive Assessment, and FI Frailty Index



**TABLE S6.** Sensitivity analysis for the Veterans RAND 12-item Health Survey (VR-12) Physical Component Summary Scores (PCS) overall and by subgroups with follow-up through December 1<sup>st</sup>, 2015 instead of August 20th, 2015.

| Group                                      | Intensive-treatment<br>Mean change/yr (95% CI)* | Standard-treatment<br>Mean change/yr (95% CI)* | Intensive - Standard<br>Difference (95% CI)* | p-value | Interaction<br>p-value |
|--------------------------------------------|-------------------------------------------------|------------------------------------------------|----------------------------------------------|---------|------------------------|
| <b>All</b>                                 | -0.227 (-0.299, -0.154)                         | -0.250 (-0.323, -0.177)                        | 0.023 (-0.080, 0.126)                        | 0.66    |                        |
| <b>Medical comorbidity index</b>           |                                                 |                                                |                                              |         | 0.05                   |
| Two or less                                | -0.440 (-0.565, -0.315)                         | -0.266 (-0.389, -0.143)                        | -0.174 (-0.349, 0.001)                       | 0.05    |                        |
| Three or four                              | -0.115 (-0.243, 0.012)                          | -0.267 (-0.396, -0.138)                        | 0.152 (-0.030, 0.334)                        | 0.10    |                        |
| Five or six                                | -0.148 (-0.304, 0.008)                          | -0.308 (-0.471, -0.145)                        | 0.160 (-0.066, 0.386)                        | 0.17    |                        |
| Seven or more                              | -0.215 (-0.404, -0.025)                         | -0.143 (-0.329, 0.042)                         | -0.071 (-0.336, 0.194)                       | 0.60    |                        |
| <b>Mental comorbidity index</b>            |                                                 |                                                |                                              |         | 0.67                   |
| Zero                                       | -0.224 (-0.306, -0.142)                         | -0.272 (-0.354, -0.189)                        | 0.048 (-0.068, 0.164)                        | 0.42    |                        |
| One                                        | -0.237 (-0.428, -0.046)                         | -0.214 (-0.407, -0.020)                        | -0.023 (-0.295, 0.249)                       | 0.87    |                        |
| Two or more                                | -0.218 (-0.475, 0.039)                          | -0.117 (-0.379, 0.144)                         | -0.100 (-0.467, 0.266)                       | 0.59    |                        |
| <b>Baseline VR-12 PCS</b>                  |                                                 |                                                |                                              |         | 0.39                   |
| ≥40                                        | -0.856 (-0.933, -0.779)                         | -0.827 (-0.904, -0.750)                        | -0.029 (-0.138, 0.080)                       | 0.60    |                        |
| <40                                        | 1.224 (1.081, 1.368)                            | 1.160 (1.013, 1.307)                           | 0.065 (-0.140, 0.27)                         | 0.54    |                        |
| <b>Age</b>                                 |                                                 |                                                |                                              |         | 0.42                   |
| <75 years                                  | -0.136 (-0.22, -0.051)                          | -0.180 (-0.265, -0.096)                        | 0.045 (-0.075, 0.164)                        | 0.46    |                        |
| 75 years or older                          | -0.515 (-0.66, -0.371)                          | -0.463 (-0.608, -0.318)                        | -0.052 (-0.257, 0.153)                       | 0.62    |                        |
| <b>Cognitive status†</b>                   |                                                 |                                                |                                              |         | 0.72                   |
| MoCA≥normative 25 <sup>th</sup> percentile | -0.282 (-0.372, -0.192)                         | -0.291 (-0.383, -0.200)                        | 0.009 (-0.119, 0.137)                        | 0.89    |                        |
| MoCA<normative 25 <sup>th</sup> percentile | -0.135 (-0.258, -0.012)                         | -0.183 (-0.304, -0.062)                        | 0.048 (-0.125, 0.221)                        | 0.59    |                        |
| <b>Frailty status ‡</b>                    |                                                 |                                                |                                              |         | 0.68                   |
| Fit (FI≤0.10)                              | -0.855 (-0.981, -0.730)                         | -0.755 (-0.879, -0.632)                        | -0.100 (-0.276, 0.076)                       | 0.27    |                        |
| Less Fit (0.10<FI≤0.21)                    | -0.380 (-0.476, -0.283)                         | -0.396 (-0.493, -0.299)                        | 0.017 (-0.120, 0.153)                        | 0.81    |                        |
| Frail (FI>0.21)                            | 0.474 (0.316, 0.633)                            | 0.452 (0.290, 0.613)                           | 0.023 (-0.203, 0.249)                        | 0.84    |                        |

\*Estimates from linear mixed model assuming linear change over time. † Based on age and education specific normative data from the Irish Longitudinal Study of Ageing, with two points added to the scores of Black and Hispanic participants. ‡ Frailty Index scores

range from 0 to 1, with higher scores denoting greater frailty. CI denotes Confidence Interval, MoCA Montreal Cognitive Assessment, and FI Frailty Index

**TABLE S7.** Sensitivity analysis for the Veterans RAND 12-item Health Survey (VR-12) Mental Component Summary Scores overall and by subgroups with follow-up through December 1<sup>st</sup>, 2015 instead of August 20th, 2015.

| Group                                      | Intensive-treatment<br>Mean change/yr (95% CI)* | Standard-treatment<br>Mean change/yr (95% CI)* | Intensive - Standard<br>Difference (95% CI)* | p-value | Interaction<br>p-value |
|--------------------------------------------|-------------------------------------------------|------------------------------------------------|----------------------------------------------|---------|------------------------|
| <b>All</b>                                 | 0.172 (0.094, 0.25)                             | 0.109 (0.031, 0.187)                           | 0.063 (-0.047, 0.173)                        | 0.26    |                        |
| <b>Medical comorbidity index</b>           |                                                 |                                                |                                              |         | 0.54                   |
| Two or less                                | 0.227 (0.082, 0.371)                            | 0.235 (0.093, 0.376)                           | -0.008 (-0.210, 0.194)                       | 0.94    |                        |
| Three or four                              | 0.271 (0.136, 0.406)                            | 0.268 (0.132, 0.405)                           | 0.003 (-0.189, 0.195)                        | 0.98    |                        |
| Five or six                                | 0.180 (0.015, 0.345)                            | -0.007 (-0.180, 0.166)                         | 0.187 (-0.052, 0.426)                        | 0.13    |                        |
| Seven or more                              | -0.126 (-0.323, 0.070)                          | -0.255 (-0.447, -0.063)                        | 0.129 (-0.146, 0.404)                        | 0.36    |                        |
| <b>Mental comorbidity index</b>            |                                                 |                                                |                                              |         | 0.70                   |
| Zero                                       | 0.068 (-0.016, 0.152)                           | -0.018 (-0.102, 0.067)                         | 0.086 (-0.034, 0.205)                        | 0.16    |                        |
| One                                        | 0.306 (0.087, 0.525)                            | 0.340 (0.118, 0.562)                           | -0.034 (-0.346, 0.278)                       | 0.83    |                        |
| Two or more                                | 0.791 (0.489, 1.093)                            | 0.699 (0.391, 1.006)                           | 0.093 (-0.338, 0.523)                        | 0.67    |                        |
| <b>Baseline VR-12 PCS</b>                  |                                                 |                                                |                                              |         | 0.72                   |
| ≥40                                        | 0.318 (0.230, 0.405)                            | 0.256 (0.169, 0.343)                           | 0.062 (-0.062, 0.185)                        | 0.33    |                        |
| <40                                        | -0.168 (-0.327, -0.008)                         | -0.269 (-0.433, -0.105)                        | 0.101 (-0.128, 0.330)                        | 0.39    |                        |
| <b>Age</b>                                 |                                                 |                                                |                                              |         | 0.12                   |
| <75 years                                  | 0.274 (0.183, 0.364)                            | 0.263 (0.172, 0.355)                           | 0.010 (-0.118, 0.139)                        | 0.88    |                        |
| 75 years or older                          | -0.118 (-0.271, 0.034)                          | -0.330 (-0.483, -0.176)                        | 0.211 (-0.005, 0.427)                        | 0.06    |                        |
| <b>Cognitive status†</b>                   |                                                 |                                                |                                              |         | 0.53                   |
| MoCA≥normative 25 <sup>th</sup> percentile | 0.193 (0.098, 0.287)                            | 0.159 (0.063, 0.255)                           | 0.034 (-0.101, 0.169)                        | 0.62    |                        |
| MoCA<normative 25 <sup>th</sup> percentile | 0.138 (0.003, 0.273)                            | 0.030 (-0.103, 0.163)                          | 0.108 (-0.081, 0.297)                        | 0.26    |                        |
| <b>Frailty status ‡</b>                    |                                                 |                                                |                                              |         | 0.88                   |
| Fit (FI≤0.10)                              | 0.029 (-0.103, 0.160)                           | -0.040 (-0.169, 0.090)                         | 0.068 (-0.117, 0.253)                        | 0.47    |                        |
| Less Fit (0.10<FI≤0.21)                    | 0.054 (-0.048, 0.156)                           | 0.017 (-0.085, 0.120)                          | 0.037 (-0.108, 0.182)                        | 0.62    |                        |
| Frail (FI>0.21)                            | 0.471 (0.291, 0.651)                            | 0.369 (0.186, 0.553)                           | 0.102 (-0.155, 0.358)                        | 0.44    |                        |

\*Estimates from linear mixed model assuming linear change over time. † Based on age and education specific normative data from the Irish Longitudinal Study of Ageing, with two points added to the scores of Black and Hispanic participants. ‡ Frailty Index scores

range from 0 to 1, with higher scores denoting greater frailty. CI denotes Confidence Interval, PCS Physical Component Summary Score, MoCA Montreal Cognitive Assessment, and FI Frailty Index



**TABLE S8.** Sensitivity analysis for the Patient Health Questionnaire (PHQ-9) scores overall and by subgroups with follow-up through December 1<sup>st</sup>, 2015 instead of August 20th, 2015.

| Group                                      | Intensive-treatment<br>Mean change/yr (95% CI)* | Standard-treatment<br>Mean change/yr (95% CI)* | Intensive - Standard<br>Difference (95% CI)* | p-value | Interaction<br>p-value |
|--------------------------------------------|-------------------------------------------------|------------------------------------------------|----------------------------------------------|---------|------------------------|
| <b>All</b>                                 | -0.042 (-0.071, -0.013)                         | -0.028 (-0.057, 0.001)                         | -0.014 (-0.055, 0.027)                       | 0.51    |                        |
| <b>Medical comorbidity index</b>           |                                                 |                                                |                                              |         | 0.65                   |
| Two or less                                | -0.046 (-0.098, 0.005)                          | -0.027 (-0.077, 0.023)                         | -0.019 (-0.091, 0.053)                       | 0.60    |                        |
| Three or four                              | -0.093 (-0.143, -0.043)                         | -0.066 (-0.116, -0.015)                        | -0.027 (-0.098, 0.044)                       | 0.46    |                        |
| Five or six                                | -0.049 (-0.110, 0.012)                          | -0.014 (-0.077, 0.050)                         | -0.035 (-0.124, 0.053)                       | 0.43    |                        |
| Seven or more                              | 0.076 (-0.003, 0.154)                           | 0.033 (-0.044, 0.109)                          | 0.043 (-0.067, 0.153)                        | 0.44    |                        |
| <b>Mental comorbidity index</b>            |                                                 |                                                |                                              |         | 0.68                   |
| Zero                                       | 0.006 (-0.022, 0.035)                           | 0.032 (0.003, 0.060)                           | -0.025 (-0.065, 0.015)                       | 0.22    |                        |
| One                                        | -0.100 (-0.189, -0.011)                         | -0.119 (-0.208, -0.029)                        | 0.019 (-0.107, 0.145)                        | 0.77    |                        |
| Two or more                                | -0.334 (-0.475, -0.192)                         | -0.341 (-0.485, -0.198)                        | 0.008 (-0.194, 0.209)                        | 0.94    |                        |
| <b>Baseline VR-12 PCS</b>                  |                                                 |                                                |                                              |         | 0.92                   |
| ≥40                                        | 0.008 (-0.021, 0.038)                           | 0.023 (-0.006, 0.053)                          | -0.015 (-0.057, 0.027)                       | 0.49    |                        |
| <40                                        | -0.155 (-0.222, -0.089)                         | -0.146 (-0.214, -0.077)                        | -0.010 (-0.105, 0.086)                       | 0.84    |                        |
| <b>Age</b>                                 |                                                 |                                                |                                              |         | 0.61                   |
| <75 years                                  | -0.098 (-0.133, -0.063)                         | -0.079 (-0.114, -0.044)                        | -0.019 (-0.069, 0.031)                       | 0.45    |                        |
| 75 years or older                          | 0.124 (0.074, 0.175)                            | 0.119 (0.068, 0.170)                           | 0.005 (-0.066, 0.077)                        | 0.89    |                        |
| <b>Cognitive status†</b>                   |                                                 |                                                |                                              |         | 0.45                   |
| MoCA≥normative 25 <sup>th</sup> percentile | -0.051 (-0.086, -0.016)                         | -0.024 (-0.059, 0.012)                         | -0.027 (-0.077, 0.022)                       | 0.28    |                        |
| MoCA<normative 25 <sup>th</sup> percentile | -0.027 (-0.078, 0.024)                          | -0.031 (-0.081, 0.019)                         | 0.004 (-0.067, 0.076)                        | 0.90    |                        |
| <b>Frailty status ‡</b>                    |                                                 |                                                |                                              |         | 0.85                   |
| Fit (FI≤0.10)                              | 0.077 (0.038, 0.116)                            | 0.108 (0.070, 0.147)                           | -0.032 (-0.087, 0.023)                       | 0.26    |                        |
| Less Fit (0.10<FI≤0.21)                    | 0.027 (-0.007, 0.061)                           | 0.026 (-0.008, 0.060)                          | 0.001 (-0.047, 0.049)                        | 0.97    |                        |
| Frail (FI>0.21)                            | -0.248 (-0.325, -0.170)                         | -0.233 (-0.312, -0.154)                        | -0.014 (-0.125, 0.096)                       | 0.80    |                        |

\*Estimates from linear mixed model assuming linear change over time. † Based on age and education specific normative data from the Irish Longitudinal Study of Ageing, with two points added to the scores of Black and Hispanic participants. ‡ Frailty Index scores

range from 0 to 1, with higher scores denoting greater frailty. CI denotes Confidence Interval, PCS Physical Component Summary Score, MoCA Montreal Cognitive Assessment, and FI Frailty Index

**TABLE S9.** Sensitivity analysis for the Veterans RAND 12-item Health Survey (VR-12) Physical Component Summary Scores (PCS) overall and by subgroups, censoring participants after the occurrence of non-fatal cardiovascular events with follow-up through August 20<sup>th</sup>, 2015.

| Group                                      | Intensive-treatment<br>Mean change/yr (95% CI)* | Standard-treatment<br>Mean change/yr (95% CI)* | Intensive - Standard<br>Difference (95% CI)* | p-value | Interaction<br>p-value |
|--------------------------------------------|-------------------------------------------------|------------------------------------------------|----------------------------------------------|---------|------------------------|
| <b>All</b>                                 | -0.228 (-0.309, -0.148)                         | -0.177 (-0.258, -0.095)                        | -0.052 (-0.166, 0.062)                       | 0.37    |                        |
| <b>Medical comorbidity index</b>           |                                                 |                                                |                                              |         | 0.25                   |
| Two or less                                | -0.382 (-0.521, -0.244)                         | -0.208 (-0.344, -0.072)                        | -0.174 (-0.369, 0.020)                       | 0.08    |                        |
| Three or four                              | -0.149 (-0.289, -0.008)                         | -0.241 (-0.385, -0.097)                        | 0.092 (-0.109, 0.294)                        | 0.37    |                        |
| Five or six                                | -0.204 (-0.378, -0.030)                         | -0.200 (-0.383, -0.017)                        | -0.004 (-0.256, 0.249)                       | 0.98    |                        |
| Seven or more                              | -0.191 (-0.397, 0.016)                          | -0.018 (-0.222, 0.187)                         | -0.173 (-0.463, 0.118)                       | 0.24    |                        |
| <b>Mental comorbidity index</b>            |                                                 |                                                |                                              |         | 0.91                   |
| Zero                                       | -0.235 (-0.325, -0.144)                         | -0.169 (-0.260, -0.077)                        | -0.066 (-0.195, 0.062)                       | 0.31    |                        |
| One                                        | -0.192 (-0.405, 0.021)                          | -0.183 (-0.400, 0.034)                         | -0.009 (-0.313, 0.295)                       | 0.95    |                        |
| Two or more                                | -0.221 (-0.508, 0.065)                          | -0.213 (-0.507, 0.081)                         | -0.008 (-0.419, 0.403)                       | 0.97    |                        |
| <b>Baseline VR-12 PCS</b>                  |                                                 |                                                |                                              |         | 0.15                   |
| ≥40                                        | -0.912 (-0.995, -0.829)                         | -0.789 (-0.873, -0.706)                        | -0.122 (-0.240, -0.004)                      | 0.04    |                        |
| <40                                        | 1.372 (1.213, 1.530)                            | 1.320 (1.157, 1.483)                           | 0.052 (-0.175, 0.279)                        | 0.65    |                        |
| <b>Age</b>                                 |                                                 |                                                |                                              |         | 0.11                   |
| <75 years                                  | -0.136 (-0.229, -0.043)                         | -0.134 (-0.228, -0.040)                        | -0.002 (-0.134, 0.130)                       | 0.98    |                        |
| 75 years or older                          | -0.537 (-0.698, -0.376)                         | -0.317 (-0.480, -0.154)                        | -0.22 (-0.448, 0.009)                        | 0.06    |                        |
| <b>Cognitive status†</b>                   |                                                 |                                                |                                              |         | 0.59                   |
| MoCA≥normative 25 <sup>th</sup> percentile | -0.287 (-0.386, -0.188)                         | -0.212 (-0.313, -0.110)                        | -0.076 (-0.217, 0.066)                       | 0.30    |                        |
| MoCA<normative 25 <sup>th</sup> percentile | -0.131 (-0.267, 0.005)                          | -0.122 (-0.258, 0.014)                         | -0.009 (-0.201, 0.183)                       | 0.93    |                        |
| <b>Frailty status ‡</b>                    |                                                 |                                                |                                              |         | 0.62                   |
| Fit (FI≤0.10)                              | -0.900 (-1.036, -0.764)                         | -0.708 (-0.842, -0.573)                        | -0.192 (-0.384, -0.001)                      | 0.05    |                        |
| Less Fit (0.10<FI≤0.21)                    | -0.372 (-0.477, -0.266)                         | -0.327 (-0.433, -0.220)                        | -0.045 (-0.195, 0.105)                       | 0.56    |                        |
| Frail (FI>0.21)                            | 0.479 (0.304, 0.655)                            | 0.540 (0.357, 0.723)                           | -0.061 (-0.314, 0.193)                       | 0.64    |                        |

\*Estimates from linear mixed model assuming linear change over time. † Based on age and education specific normative data from the Irish Longitudinal Study of Ageing, with two points added to the scores of Black and Hispanic participants. ‡ Frailty Index scores

range from 0 to 1, with higher scores denoting greater frailty. CI denotes Confidence Interval, MoCA Montreal Cognitive Assessment, and FI Frailty Index

**TABLE S10.** Sensitivity analysis for the Veterans RAND 12-item Health Survey (VR-12) Mental Component Summary Scores overall and by subgroups, censoring participants after the occurrence of non-fatal cardiovascular events with follow-up through August 20<sup>th</sup>, 2015.

| Group                                      | Intensive-treatment<br>Mean change/yr (95% CI)* | Standard-treatment<br>Mean change/yr (95% CI)* | Intensive - Standard<br>Difference (95% CI)* | p-value | Interaction<br>p-value |
|--------------------------------------------|-------------------------------------------------|------------------------------------------------|----------------------------------------------|---------|------------------------|
| <b>All</b>                                 | 0.171 (0.085, 0.257)                            | 0.164 (0.077, 0.251)                           | 0.007 (-0.116, 0.129)                        | 0.91    |                        |
| <b>Medical comorbidity index</b>           |                                                 |                                                |                                              |         | 0.51                   |
| Two or less                                | 0.225 (0.065, 0.384)                            | 0.262 (0.105, 0.419)                           | -0.037 (-0.261, 0.186)                       | 0.74    |                        |
| Three or four                              | 0.267 (0.117, 0.417)                            | 0.333 (0.179, 0.487)                           | -0.066 (-0.281, 0.149)                       | 0.55    |                        |
| Five or six                                | 0.188 (0.006, 0.371)                            | 0.007 (-0.184, 0.198)                          | 0.181 (-0.083, 0.446)                        | 0.18    |                        |
| Seven or more                              | -0.140 (-0.354, 0.075)                          | -0.138 (-0.351, 0.074)                         | -0.002 (-0.303, 0.300)                       | 0.99    |                        |
| <b>Mental comorbidity index</b>            |                                                 |                                                |                                              |         | 0.94                   |
| Zero                                       | 0.059 (-0.033, 0.152)                           | 0.040 (-0.053, 0.133)                          | 0.019 (-0.112, 0.150)                        | 0.77    |                        |
| One                                        | 0.315 (0.070, 0.560)                            | 0.332 (0.082, 0.582)                           | -0.017 (-0.367, 0.333)                       | 0.92    |                        |
| Two or more                                | 0.803 (0.468, 1.139)                            | 0.823 (0.479, 1.168)                           | -0.020 (-0.501, 0.461)                       | 0.94    |                        |
| <b>Baseline VR-12 PCS</b>                  |                                                 |                                                |                                              |         | 0.70                   |
| ≥40                                        | 0.339 (0.243, 0.435)                            | 0.309 (0.212, 0.406)                           | 0.030 (-0.107, 0.166)                        | 0.67    |                        |
| <40                                        | -0.234 (-0.411, -0.056)                         | -0.207 (-0.39, -0.025)                         | -0.026 (-0.281, 0.228)                       | 0.84    |                        |
| <b>Age</b>                                 |                                                 |                                                |                                              |         | 0.26                   |
| <75 years                                  | 0.268 (0.168, 0.368)                            | 0.304 (0.203, 0.406)                           | -0.036 (-0.179, 0.106)                       | 0.62    |                        |
| 75 years or older                          | -0.111 (-0.281, 0.059)                          | -0.236 (-0.408, -0.064)                        | 0.125 (-0.117, 0.367)                        | 0.31    |                        |
| <b>Cognitive status†</b>                   |                                                 |                                                |                                              |         | 0.84                   |
| MoCA≥normative 25 <sup>th</sup> percentile | 0.210 (0.106, 0.314)                            | 0.212 (0.105, 0.319)                           | -0.002 (-0.151, 0.147)                       | 0.98    |                        |
| MoCA<normative 25 <sup>th</sup> percentile | 0.109 (-0.040, 0.259)                           | 0.085 (-0.063, 0.234)                          | 0.024 (-0.187, 0.234)                        | 0.82    |                        |
| <b>Frailty status ‡</b>                    |                                                 |                                                |                                              |         | 0.77                   |
| Fit (FI≤0.10)                              | 0.047 (-0.095, 0.189)                           | -0.048 (-0.189, 0.093)                         | 0.096 (-0.105, 0.296)                        | 0.35    |                        |
| Less Fit (0.10<FI≤0.21)                    | 0.039 (-0.074, 0.153)                           | 0.045 (-0.069, 0.159)                          | -0.006 (-0.166, 0.155)                       | 0.94    |                        |
| Frail (FI>0.21)                            | 0.460 (0.262, 0.659)                            | 0.509 (0.302, 0.716)                           | -0.049 (-0.336, 0.238)                       | 0.74    |                        |

\*Estimates from linear mixed model assuming linear change over time. † Based on age and education specific normative data from the Irish Longitudinal Study of Ageing, with two points added to the scores of Black and Hispanic participants. ‡ Frailty Index scores

range from 0 to 1, with higher scores denoting greater frailty. CI denotes Confidence Interval, PCS Physical Component Summary Score, MoCA Montreal Cognitive Assessment, and FI Frailty Index

**TABLE S11.** Sensitivity analysis for the Patient Health Questionnaire (PHQ-9) scores overall and by subgroups, censoring participants after the occurrence of non-fatal cardiovascular events with follow-up through August 20<sup>th</sup>, 2015.

| Group                                      | Intensive-treatment<br>Mean change/yr (95% CI)* | Standard-treatment<br>Mean change/yr (95% CI)* | Intensive - Standard<br>Difference (95% CI)* | p-value | Interaction<br>p-value |
|--------------------------------------------|-------------------------------------------------|------------------------------------------------|----------------------------------------------|---------|------------------------|
| <b>All</b>                                 | -0.036 (-0.068, -0.004)                         | -0.051 (-0.083, -0.018)                        | 0.015 (-0.031, 0.061)                        | 0.52    |                        |
| <b>Medical comorbidity index</b>           |                                                 |                                                |                                              |         | 0.38                   |
| Two or less                                | -0.033 (-0.090, 0.025)                          | -0.051 (-0.107, 0.006)                         | 0.018 (-0.063, 0.099)                        | 0.66    |                        |
| Three or four                              | -0.104 (-0.160, -0.049)                         | -0.080 (-0.137, -0.022)                        | -0.025 (-0.105, 0.055)                       | 0.54    |                        |
| Five or six                                | -0.014 (-0.081, 0.053)                          | -0.018 (-0.088, 0.052)                         | 0.004 (-0.093, 0.101)                        | 0.93    |                        |
| Seven or more                              | 0.072 (-0.013, 0.157)                           | -0.024 (-0.108, 0.061)                         | 0.095 (-0.024, 0.215)                        | 0.12    |                        |
| <b>Mental comorbidity index</b>            |                                                 |                                                |                                              |         | 0.65                   |
| Zero                                       | 0.016 (-0.015, 0.047)                           | 0.012 (-0.020, 0.043)                          | 0.004 (-0.040, 0.048)                        | 0.85    |                        |
| One                                        | -0.098 (-0.196, 0.001)                          | -0.131 (-0.232, -0.031)                        | 0.034 (-0.107, 0.174)                        | 0.64    |                        |
| Two or more                                | -0.34 (-0.496, -0.183)                          | -0.408 (-0.568, -0.247)                        | 0.068 (-0.156, 0.292)                        | 0.55    |                        |
| <b>Baseline VR-12 PCS</b>                  |                                                 |                                                |                                              |         | 0.55                   |
| ≥40                                        | 0.014 (-0.018, 0.047)                           | 0.007 (-0.026, 0.040)                          | 0.007 (-0.039, 0.053)                        | 0.76    |                        |
| <40                                        | -0.147 (-0.221, -0.073)                         | -0.185 (-0.261, -0.109)                        | 0.038 (-0.068, 0.144)                        | 0.48    |                        |
| <b>Age</b>                                 |                                                 |                                                |                                              |         | 0.34                   |
| <75 years                                  | -0.092 (-0.131, -0.054)                         | -0.096 (-0.135, -0.057)                        | 0.004 (-0.052, 0.059)                        | 0.90    |                        |
| 75 years or older                          | 0.137 (0.081, 0.193)                            | 0.082 (0.025, 0.139)                           | 0.055 (-0.025, 0.135)                        | 0.18    |                        |
| <b>Cognitive status†</b>                   |                                                 |                                                |                                              |         | 0.54                   |
| MoCA≥normative 25 <sup>th</sup> percentile | -0.047 (-0.085, -0.009)                         | -0.049 (-0.088, -0.009)                        | 0.002 (-0.053, 0.057)                        | 0.95    |                        |
| MoCA<normative 25 <sup>th</sup> percentile | -0.018 (-0.074, 0.038)                          | -0.049 (-0.104, 0.007)                         | 0.031 (-0.049, 0.110)                        | 0.45    |                        |
| <b>Frailty status ‡</b>                    |                                                 |                                                |                                              |         | 0.42                   |
| Fit (FI≤0.10)                              | 0.081 (0.038, 0.124)                            | 0.114 (0.071, 0.156)                           | -0.033 (-0.093, 0.028)                       | 0.29    |                        |
| Less Fit (0.10<FI≤0.21)                    | 0.030 (-0.007, 0.067)                           | 0.010 (-0.028, 0.047)                          | 0.020 (-0.033, 0.073)                        | 0.45    |                        |
| Frail (FI>0.21)                            | -0.227 (-0.312, -0.141)                         | -0.288 (-0.377, -0.199)                        | 0.061 (-0.063, 0.184)                        | 0.33    |                        |

\*Estimates from linear mixed model assuming linear change over time. † Based on age and education specific normative data from the Irish Longitudinal Study of Ageing, with two points added to the scores of Black and Hispanic participants. ‡ Frailty Index scores

range from 0 to 1, with higher scores denoting greater frailty. CI denotes Confidence Interval, PCS Physical Component Summary Score, MoCA Montreal Cognitive Assessment, and FI Frailty Index



**TABLE S12.** Sensitivity analyses for Veterans RAND 12 Item Health Survey (VR-12) scores based on multiple imputation

| Outcome                                                       | Imputation Scenario | Shift ( $\delta$ ) | Intensive-treatment<br>Mean Change/yr (95% CI)* | Standard-treatment<br>Mean Change/yr (95% CI)* | Intensive - Standard<br>Difference (95% CI) | p-value |
|---------------------------------------------------------------|---------------------|--------------------|-------------------------------------------------|------------------------------------------------|---------------------------------------------|---------|
| <b>VR-12<br/>Physical<br/>Component<br/>Summary<br/>Score</b> | Observed data       | NA                 | -0.23 (-0.31, -0.16)                            | -0.23 (-0.31, -0.15)                           | -0.01 (-0.12, 0.11)                         | 0.90    |
|                                                               | MAR                 | 0                  | -0.23 (-0.31, -0.15)                            | -0.23 (-0.31, -0.14)                           | 0.00 (-0.12, 0.11)                          | 0.95    |
|                                                               | MNAR                | 1                  | -0.30 (-0.38, -0.22)                            | -0.23 (-0.31, -0.14)                           | -0.07 (-0.19, 0.04)                         | 0.21    |
|                                                               | MNAR                | 2                  | -0.37 (-0.45, -0.29)                            | -0.22 (-0.30, -0.14)                           | -0.15 (-0.26, -0.03)                        | 0.014   |
|                                                               | MNAR                | 3                  | -0.44 (-0.52, -0.35)                            | -0.22 (-0.31, -0.14)                           | -0.21 (-0.33, -0.10)                        | <0.001  |
|                                                               | MNAR                | 4                  | -0.51 (-0.59, -0.43)                            | -0.23 (-0.31, -0.14)                           | -0.28 (-0.40, -0.17)                        | <0.001  |
| Outcome                                                       | Imputation Scenario | Shift ( $\delta$ ) | Mean Change/yr (95% CI)*                        | Mean Change/yr (95% CI)*                       | Difference (95% CI)                         | p-value |
| <b>VR-12 Mental<br/>Component<br/>Summary<br/>Score</b>       | Observed data       | NA                 | 0.15 (0.07, 0.24)                               | 0.14 (0.05, 0.22)                              | 0.02 (-0.10, 0.14)                          | 0.79    |
|                                                               | MAR                 | 0                  | 0.17 (0.08, 0.26)                               | 0.14 (0.05, 0.23)                              | 0.03 (-0.09, 0.15)                          | 0.64    |
|                                                               | MNAR                | 1                  | 0.11 (0.02, 0.20)                               | 0.14 (0.05, 0.23)                              | -0.03 (-0.16, 0.09)                         | 0.63    |
|                                                               | MNAR                | 2                  | 0.04 (-0.04, 0.13)                              | 0.14 (0.05, 0.22)                              | -0.09 (-0.22, 0.03)                         | 0.14    |
|                                                               | MNAR                | 3                  | -0.01 (-0.10, 0.07)                             | 0.14 (0.05, 0.23)                              | -0.16 (-0.28, -0.03)                        | 0.013   |
|                                                               | MNAR                | 4                  | -0.08 (-0.17, 0.01)                             | 0.14 (0.05, 0.23)                              | -0.22 (-0.34, -0.10)                        | 0.001   |

MAR denotes missing at random, MNAR missing not at random, and CI Confidence Interval. \*Estimates from mixed model assuming linear change over time.

## REFERENCES

1. Schluchter MD, Elashoff JD. Small-Sample Adjustments to Tests with Unblanced Repeated Measures Assuming Several Covariance Structures. *J Stat Comput Simul* 1990;37:69–87.
2. Nasreddine ZS, Phillips NA, Bédirian V, et al. The Montreal Cognitive Assessment, MoCA: a brief screening tool for mild cognitive impairment. *J Am Geriatr Soc* 2005;53(4):695–9.
3. Kenny RA, Coen RF, Frewen J, Donoghue OA, Cronin H, Savva GM. Normative values of cognitive and physical function in older adults: findings from the irish longitudinal study on ageing. *J Am Geriatr Soc* 2013;61 Suppl 2:S279-90.
4. Pajewski NM, Williamson JD, Applegate WB, et al. Characterizing Frailty Status in the Systolic Blood Pressure Intervention Trial. *J Gerontol A Biol Sci Med Sci* 2016;71(5):649–55.
